# Supplementary material for: Visual “Dam-Break Drainage” Nucleic Acid Chips: Family-Affordable Platform for Rapid and Ultrasensitive Pathogens Detection
Source: Research Square preprint supplement (doi:10.21203/rs.3.rs-8576721/v1), 2026-01-19
Supplement: Supplementary file 1 [file 1739fbba96fc802687432da4.xlsx]

## Sheet: Fig.3f
cycles
1	31823	35782.6	30988.9	31278.1	31328.9	30429.4	36144.3	36268.8	59508.9	31278.1	30988.9	60623.6	57997.6	58196.1	49229.3	52053.6	56190.6	47089	45867.7	48308.5	25555.4	16755.2	8010.08	38521.3	33600.9	30856	29901.4	29230.8	69091.4	32325.9	28347.3	58244.8	31185.5	34480.8	31965.4	33089	34039.8	44325.6	32102.3
2	32157.8	36530.2	31684.5	31139	31657.2	30667.6	36819.4	36897.2	61735.7	31139	31684.5	61148.6	58768.3	58796.1	50496.8	52865.6	56690	47425.5	46187.7	48858.6	25765.8	17077	8140.94	39241.6	34269.2	31226.6	30670.5	29740.7	70331.4	32944.8	29046	59389.4	31780.7	35149.2	32601.8	33607.4	34762.8	44981.1	32729.8
3	32320	36959.4	32223.3	31335.4	31883.7	30713	37077.4	37475.5	62055.8	31335.4	32223.3	61586.6	59125.6	59184.8	50996.8	53549	57005.7	47854.6	46668.5	49056.6	26005.2	17120.7	8314	39496.2	34473.6	31510.4	30933.7	30181	70530.4	33239.2	29469.4	60432.4	32142.7	35380.4	33073.9	33945.4	35082.2	45314.4	33006.7
4	32436	37317.7	32434.9	31499.2	32168.1	30891.1	37129.2	37721.4	62576.6	31499.2	32434.9	62014.6	59765.3	60196.2	51358.6	54018.5	57468.5	48123.5	47015.5	49556.6	26228.7	17240.7	8320.95	39825.1	34985.3	31798.3	31165.5	30459.3	71238	33632	29484.4	60833.7	32247.1	35644.5	33245.4	34059.4	35318	45629.3	33362
5	32591.3	37618.2	32792.4	31652.2	32314.6	30876.7	37294.8	37928.4	62755.8	31652.2	32792.4	62830.8	60462.4	60899	51865.5	54498.6	57955	48621.5	47468.3	49956.6	26348.1	17277.6	8396.49	39926.2	35122.4	31946.3	31354.6	30668.3	71465.4	33911.8	29792.6	61296.5	32555.3	35775.4	33492.5	34284.5	35440.7	46062.8	33526.3
6	32670.9	37822.7	33183.4	31822	32380.8	30972.3	37371.5	38056.6	63564.4	31822	33183.4	63854.2	61536	61154.6	52086.8	54953.7	58430.2	49088.8	47857.6	50245.2	26495	17329.7	8502.75	40184.6	35184.4	32069.5	31470.5	30825.4	71248.1	33919.9	29735	62185.5	32863.4	36012.8	33721	34327.8	35547.5	46149.3	33680.8
7	32759.5	37925.7	33283.7	31863.3	32592.1	31029	37532.4	38141.5	64102	31863.3	33283.7	64513.8	62372.1	62897.2	52486.8	55347	58989.9	49420	48227.9	50624.9	26580.6	17382.3	8479.72	40139.4	35438.7	32163.3	31657.4	30998.5	71774	34101.8	29880	62270.7	32914.6	36060.2	33788.9	34429.7	35689.9	46428.6	33795.9
8	32847.7	37981.4	33316.8	31911.9	32570.3	31088.6	37460.9	38325.1	64335.9	31911.9	33316.8	64892.7	62952.2	63955.8	52997.3	56689.6	59390	50349.3	49648.9	51762.2	26553.6	17449	8570.34	40250	35318.4	32241.1	31663.1	30992.6	71719.6	34027.8	29888.4	62622.5	33048.7	36308.3	33872.6	34475.5	35730.9	46438.9	33847
9	32990.3	37969.5	33054.8	31994	32672.1	31175.2	37452.2	38333.7	64560.7	31994	33054.8	65069.8	63292.7	64499.7	53221.1	57534.1	59954.2	51077	50166.6	52719.4	26635.7	17545.3	8548.92	40421	35631.4	32434.7	31857.7	31138.1	72050.2	34059.6	29802.6	62953.9	32925.5	36234.1	33867.3	34619.9	35715.1	46748.9	33995.5
10	33060	38123.7	33198.9	32068	32627.3	31197.8	37498.8	38400.5	64607.4	32068	33198.9	65288.5	63565.5	64880.2	53204.9	58218.4	60315.2	51139.6	50536.7	53256.5	26683.6	17567.7	8583.52	40437.2	35612.5	32545.6	31855.6	31197.7	71749.7	33976.7	29914.6	63257.8	33070.1	36379.6	33974.2	34660.8	35843.4	46957	33997.8
11	33056.9	38157.3	33311.4	31976.5	32684.5	31054.2	37587.7	38466.9	64802.5	31976.5	33311.4	65307.1	63665.7	65224	53481.9	58513.5	60581.4	51432.9	50772.9	53568.8	26757.7	17447.5	8590.56	40404.1	35684.2	32568.6	31851.5	31192.3	72207.2	34009.7	29909.8	63128.6	33154.9	36435.9	33982.4	34547.9	35961.1	46994.3	34061.4
12	33054.5	38258.6	33492.8	31898.9	32807.5	31043.9	37576.7	38581.7	64951.1	31898.9	33492.8	65359.8	63798	65372.1	53575.6	58679.2	60768.5	51549	50317.5	53578.4	26786.5	17414.9	8610.78	40306.6	35831	32607	31891.1	31210.1	72193.4	34249.8	29998.7	63448.5	33175.4	36381.7	34056.3	34505.6	36084.8	46872.3	34115.2
13	33138.9	38239.2	33374.4	31998	32753.9	31096.3	37495.9	38640.8	65022.5	31998	33374.4	65431.3	63919.6	65579.3	53931.9	58967.5	60890.3	51797.8	50687.4	53641.8	26788.5	17540.9	8661.83	40432.6	35692.1	32696.5	31976.4	31308.1	71967.4	34111.3	30007.5	63875.8	33218.5	36474.8	34075.4	34542.9	36137.2	46996.1	34164.8
14	33110.6	38247.6	33382	32033.6	32934.3	31173.6	37473.1	38590.7	64989.6	32033.6	33382	65416	63997.7	65622.6	54060.8	58990	61049.4	51719.1	50816.4	53922.8	26810.2	17632	8644.02	40364	35964.7	32804.6	32056.4	31362.2	72058.7	34187.1	29946.4	63566.1	33110.6	36456.9	34113.7	34667.9	36166.7	47267.6	34220.9
15	33217.6	38232.8	33376.6	32006	32957.4	31152.5	37625.6	38625.4	65034	32006	33376.6	65424	64010.4	65410.1	53988.4	59399.5	61147.2	51728.2	50989.4	54091.2	26796.1	17546.3	8616.99	40405.7	36129.7	32815.5	32138.8	31368.2	72436.9	34297.8	30006.4	63641.4	33019.1	36525.2	34149.4	34587.6	36297.9	47396.7	34294.5
16	33322.5	38281.4	33261.7	32066.9	32874	31184.4	37534.7	38753.7	65088	32066.9	33261.7	65495.6	64038.8	65446.6	54288.6	59485.8	61308.1	51785.2	51111.9	54132.3	26911.4	17592.8	8662.45	40393.3	36030	32931.8	32168.8	31472.5	72350.1	34185.2	29978.7	64041	33118.5	36596.7	34170	34562.1	36245.8	47533.4	34266.2
17	33114.2	38342.3	33383.1	32128.1	32814.9	31118.4	37589.4	38727.1	65022.8	32128.1	33383.1	65477.9	63985.9	65484.9	54087.3	59518.1	61249	51788.3	51061.1	53963.1	26878	17599.8	8673.55	40541.6	35959.8	32839.2	32132.4	31399	72205.2	34162.9	29890	64326.3	33249.6	36588.3	34141.3	34619.2	36258.2	47494.1	34286.4
18	33308.3	38290	33314.2	32088	32908.9	31167.7	37534.6	38795.1	65080.4	32088	33314.2	65407.4	64003.6	65538.8	54123	59561.5	61383	51844.7	51021.5	54120.4	26976.4	17576.6	8657.29	40436.4	36191.2	32982.8	32246.8	31501.9	72164	34171.4	29999.2	64499.5	33063.2	36557.8	34227.7	34608.3	36330.4	47735.6	34360.6
19	33255.1	38410	33461.9	31967.1	33021.4	31017.5	37665.9	38793.5	65024.6	31967.1	33461.9	65389.1	64014.1	65652.4	54193.2	59550.9	61438.4	51887.4	51017	53939.2	27040	17527	8643.6	40412	36425.1	33022.8	32245.6	31461.1	72212.9	34443.6	30228.9	64614.4	33182.6	36554.8	34290.9	34585.3	36513.2	47647.1	34461.1
20	33309.1	38408.5	33403.8	31953.1	33051.3	31034.5	37670.3	38944	65139.4	31953.1	33403.8	65426.5	63991.8	65739.8	54032.8	59640.9	61432.6	51963.7	51092.1	54005.3	27080.9	17556.2	8662.74	40347.8	36382.8	33076.6	32292.3	31492.3	72247.3	34515.1	30056.9	64642.8	33146	36559.7	34249.7	34526.3	36620.5	47694.6	34462.9
21	33274.6	38497.6	33576.7	32041.2	33001.4	31027.3	37681.9	38948.6	65154.9	32041.2	33576.7	65433.7	64018.4	65501	54090.9	59838.1	61460.6	51776.8	51089.2	54130.7	27134.3	17551.2	8718.56	40397.3	36347.5	33109.7	32280	31530.6	72324.7	34447.5	30132.8	64452.1	33342.3	36627.4	34337.2	34570.7	36596.9	47734.8	34455.8
22	33359.4	38514.7	33505.6	32031.4	33098.6	31062.5	37696	38981.7	65123	32031.4	33505.6	65410.9	64078.1	65561.8	54167.1	59808.7	61539.7	51860.4	51027.9	53920	27152.4	17599.2	8711.94	40390.2	36504.1	33202.3	32361.8	31582	72327.3	34491.5	30145.9	64651.9	33295	36612.7	34344.4	34594.5	36672.7	47782.3	34493.3
23	33464.4	38599.7	33478.5	32135.5	32976.2	31056.6	37630.5	39009	65171.3	32135.5	33478.5	65385.2	64128.6	65660.1	54161.9	60006.8	61512.3	51819.2	50932.6	54120.6	27346.7	17694.8	8829.44	40678	36376.8	33320.9	32418.5	31588.2	72573	34408.6	30187	64581.5	33412.2	36829.8	34370.2	34608.7	36662.3	47805.8	34449.7
24	33437	38453.3	33433.5	32128	33117	31158.1	37700.7	39008.6	65215.8	32128	33433.5	65482.9	64082.7	65643.3	54212.8	60112.4	61577.9	51807.6	51240.5	53946.1	27715	17869.2	8835.98	40746.6	36796.2	33456.5	32632	31766.1	72739	34499	30174.7	64627.6	33256.2	36737.9	34436.5	34783.8	36865.2	48084.5	34554.6
25	33419.5	38647.9	33587.1	32121.6	33091.8	31075.2	37750.5	39042.9	65142.3	32121.6	33587.1	65419.5	64126.7	65810.3	54337.8	60110.3	61622.8	51797.4	51095.7	54126.9	28323.2	18004.8	8980.95	41069.4	36911.8	33655.7	32767.3	31865.3	72738.7	34638	30313.8	64818.3	33611.9	36893.9	34579.7	34720.3	36836.1	47864.4	34564
26	33521.5	38628.9	33590.2	32115.2	33069	31116.8	37854	39126.8	65155.7	32115.2	33590.2	65396.8	64094.5	65722.3	54161.4	60235.1	61754.4	51881.7	51068.9	54193.4	29258.2	18469.5	9149.6	41649.3	37422.7	34143.1	33129.5	32153.6	73181.4	34795.2	30577.9	64974.1	33643.1	37024.4	34653	34819.9	36980.3	48110.6	34603.2
27	33584	38634	33521.9	32154.1	33189.8	31137.3	37839.5	39225	65242.6	32154.1	33521.9	65452.6	64102.7	65833.5	54235.6	60302.1	61704.5	51830.7	51164.7	54237.5	30753.6	19128.2	9525.89	42796.4	38169.1	34822.7	33741	32736.3	73344.9	35216.1	30961.7	65624.4	33660.9	37267.4	34772.2	34870.3	37138.9	48168.7	34644.5
28	33445.5	38737.4	33641.9	32232.8	33061.7	31158.5	37778.6	39274.3	65262.3	32232.8	33641.9	65466.3	64070.1	65730.2	54487.9	60365.1	61766.8	51918.1	51207.2	54100.8	32840.1	20149.3	10202	44605.1	39169.8	36093.8	34561.7	33663.4	74218.1	35681.9	31373	66455.4	34149.5	37770.3	35101.8	35115	37358.6	48174.2	34656.1
29	33677.5	38685.4	33571.4	32365.4	33206.1	31251.8	37711.1	39261.6	65294.1	32365.4	33571.4	65423.2	64171.8	65881.7	54423	60210.4	61739.4	51923.5	50985.5	54131.7	35662.7	21801.2	11109.6	47127.4	41334.1	38105.9	36313.2	35172.4	75881	36870.8	32312.8	67642.7	34633.4	38588.6	35579.9	35468.1	37799.1	48771.6	34830.5
30	33876.7	38861.1	33752.8	32359.4	33357.6	31206.7	37969.9	39295.9	65363	32359.4	33752.8	65530	64184.5	65852.2	54224.3	60538.2	61669.7	51797	51010.1	54022.3	38671.6	23674.5	12345.1	50413.4	44157.1	40703.6	38593.1	37460.8	78388.6	38828.7	33906.4	69776.8	35788.3	39955.5	36494.1	36088.3	38742.8	49012.2	35096.6
31	34128.7	39016.4	33824.8	32640.8	33405.6	31357.8	37922.4	39523.8	65547.3	32640.8	33824.8	65557.2	64285.6	65695.3	54364.1	60386.1	61676	51949.2	51295.4	54190.5	41961.7	25996.1	13801.2	54415.4	47382.8	44134.5	41526.2	40296.3	81458.9	41176.5	36104.2	72825.3	37641.3	42183.9	37969.6	37299	40019.6	49785.8	35449
32	34664.4	39451.3	34334	32860.7	33768.6	31422.4	38182.4	39652.8	65800.8	32860.7	34334	65790.3	64471.8	65683.2	54207.4	60584.7	61756.8	51987.3	51152.7	54224.8	45198.1	28272.1	15253.9	58556.9	51479.9	48045	44996.1	43733.8	85883.8	44624.2	38984.3	76817.6	40143.2	45171.1	40162.5	39071.2	42240.6	51023.8	36264.8
33	35736.7	39957.8	34702.9	33491.3	34479.2	31817.5	38473.9	40106.6	66312.2	33491.3	34702.9	66027.1	64765.4	66068.4	54444.6	60661.4	61904.1	52028.7	51224.5	54314.7	48654.2	30601.2	16489.6	63034.3	55726.3	52171.4	48922.7	47729.8	90392.8	48416.3	42276.9	81973.2	43212.8	48747	43061.4	41829.5	45296.5	53294.2	37598
34	37218.3	41071.4	35917.4	34439.3	35654.8	32242.1	39288	40704.2	67253.4	34439.3	35917.4	66593.8	65416.7	66295.3	54653.2	60947.9	62070.6	52130.2	51480.7	54433.5	51660	32540.6	17528.5	67263.5	60134.1	56228.9	52831.8	51529.4	95286.8	52859.9	46042.9	87880.4	47018.9	53073	46665.8	45005	49178.3	55956.5	39739.9
35	39588.6	42945.6	37714.8	36203.3	37287	33240.2	40447.4	42009	68794.1	36203.3	37714.8	67727.3	66485.1	66635.2	55376.1	61271.6	62392.6	52432	51607.3	54684.4	54596.2	34558.4	18452.9	71745.3	64016.4	60203.8	56630.7	55316.3	101168	56744.8	49687.1	93463.9	51377.7	57620.2	50545.8	49045.9	53405.6	59509.5	42496.8
36	42969	45517.9	39872.6	38528.1	40029.4	34840.2	42539	43877.2	71323.5	38528.1	39872.6	69433.1	68460.6	67393.3	56073.1	62080.9	62905.3	53047.5	52037.1	55521.3	57259.3	36186.4	18860.2	75775.6	68540.7	64080.8	60495.9	58986.1	106733	61336.5	53232.6	98830.5	55227.9	61937.3	54580.2	53331.7	58181.8	63398.6	46208.2
37	46521	49117.9	43449	41594.2	43117.7	37031.1	45427.5	46763.2	74864.2	41594.2	43449	72038.8	71342.1	68883.7	57524.9	63190.4	63835.4	53941.4	52541.9	56428.2	59365.7	37133.4	19109.4	79438.4	71806.4	67444.5	63817.5	62473.3	111883	65126.4	56805.2	104102	59401.1	66332.7	58736.6	57498.3	62894.3	67806.2	50136.9
38	50435.9	53282.2	47161.6	45477.7	46586.4	40109.6	48953.4	50437.5	79233.3	45477.7	47161.6	75665.7	75373	71332.1	60043.3	65050.8	65502.1	55645.2	53943.3	58307.9	61462.2	38074.1	19373.9	83199.1	74761.1	70509.3	66911.2	65647.3	116650	68365.8	59621.2	109822	63396.9	70539.6	62609.1	61961.1	67162	72234.9	54276.2
39	54347	57798.7	51247.3	49198.3	50690.1	43459.4	53263.5	54633.1	84351.9	49198.3	51247.3	80037.3	80244.7	74988.4	62879.1	67996	67993	58010.7	55825.5	60924.7	63006.7	38466.2	19295.7	86503.9	77952.6	73353.5	69823.2	68257.9	122195	71972.8	62436.1	113864	66521.3	73835.3	66026.4	65573.1	71520.2	76503.9	58688.1
40	58132.1	62509.4	55072.2	53271.6	54648.9	47188.2	57653.7	59424.9	89579.3	53271.6	55072.2	84887.7	85571.4	79474.3	66926.7	71601	71510.9	61137.2	58495.6	64653.3	64483.6	38677.3	19352.6	89287.5	80575.9	75679.7	72159	70591.4	126635	74715.3	64839.6	117810	69634.2	77015.2	69103.3	69237.5	75268.9	80145.7	62754.7
41	61961.4	67081.3	59393.4	57077.6	58392.8	50895.1	62302.6	64111.8	94798.3	57077.6	59393.4	89893.1	91167.6	84340.2	71426.5	76035.6	75825.4	65104.8	61962.1	68932.4	65807	38864.7	19387.3	91670.6	82572.1	77560	74115.8	72909.8	130666	77304.4	67038.6	121853	72346.2	79897.7	72064.3	72487.1	78802.3	83918.2	66532.3
42	65160.1	71767.2	63311.3	60707.1	61818.7	54412	66693.9	68810.4	100043	60707.1	63311.3	95004.7	96682.9	89623.4	76078.1	80610.2	80588.5	69341.7	65911.9	73739.3	66487.5	38815.9	19540.7	93762.9	83980.7	79073.7	75614.3	74291.1	135340	79116.2	68801	124194	75091.7	82180.7	74600.3	74922.4	81813.8	86705.1	69866.7
43	68497.1	75612.6	66494.2	64187.6	65125.7	58017.4	70488.8	73178.2	105010	64187.6	66494.2	100054	102063	95575.3	80528.6	85642.6	85498.7	73603.5	70524	78710.5	67338.2	39071.9	19530.6	95870.9	85676.1	80649.4	77342.8	75980.6	138287	80727.4	70248.2	127052	76568	84152.2	76437	77559.9	84128.5	89706.9	72922.8
44	70931.4	79335.7	69738.9	67209	67883.9	61166	74263	76979.5	109775	67209	69738.9	104740	107130	100629	85217.3	90248.5	90487.4	78218.5	74614.2	83542.7	67860.7	39023.4	19559.1	97604.2	86440.8	81425.4	78347.2	76827.4	142455	81901.8	71688.1	128098	78540.7	85963.1	78299.6	79576.7	86028.5	91825.6	75497.4
45	73224.8	82465	72420.7	69726.4	70745.7	63887.4	77842.2	80613.3	113985	69726.4	72420.7	109177	111835	105762	89454.8	95071.7	95172.8	82115	78631.9	88105.2	68327.6	39011.4	19447.3	98608.9	87803.8	82417.2	79258.5	77869.8	144770	83585.8	72589.4	130066	79574.2	87177.3	79742.4	81055.9	88064.4	93939.3	77841.7
46	75045.3	85402.6	74919.4	72025.3	72558.2	66285.9	80789.9	84000	118045	72025.3	74919.4	113400	116281	110997	93780.8	99311.8	100079	86148.6	82811.8	92854.7	68683.2	38979.2	19599.8	100006	88010	83025.4	79981.1	78342.6	148183	84203.8	73431.8	131045	81196.7	88503	80929.5	82396.8	89320.5	95100.9	79580.6
47	76437.5	87737.8	76754	73759.7	74482.7	68368.4	83348.3	86646.1	121493	73759.7	76754	117271	120161	115505	97839.6	103906	104359	89728.2	86956.2	97034.7	68721.8	39035.7	19543.6	100945	88776.8	83498.3	80448.4	79008.1	150157	85136.2	74084.8	132000	82040.6	89225.3	82069.8	83424.5	90389.3	96578.7	81140.2
48	78050.6	89601.2	78281.7	75524.9	75729.7	70398	85412.7	89019.9	124716	75524.9	78281.7	121024	123807	119474	101235	107777	108229	93187.4	90462	100896	68978.2	39264.6	19552.6	102020	89000.7	83941.8	80822.3	79537.5	152781	85090.1	74521.7	132725	82663.4	90153.7	82627.6	84380.9	91088.1	97606.6	82361.4
49	78935.9	91313.9	79790.7	76776.8	76870.9	71729.9	87162.5	90883.1	127773	76776.8	79790.7	123964	126861	123259	104841	110971	112268	96458.2	93534.8	104326	69054.6	39175.8	19558.9	102520	89425.7	84131.9	81127.4	79635	154298	85690.7	74775.6	133510	83353.9	90603.9	83208	85031.1	91882.1	98474.8	83379.8
50	79738.1	92640.7	80954.9	77717.9	77883.8	72739.3	88581.6	92471.5	130406	77717.9	80954.9	126940	129856	126722	107787	114716	115517	99637.1	96564.5	107891	68993.8	39195.5	19527.6	102823	89765.3	84442.7	81319.5	80119.9	156720	86427.9	75294.1	133715	83594.4	90843.8	83699	85420.2	92559.1	99356.3	84197.3
51	80664.2	93569.4	81559.9	78735.3	78532.1	73831.4	89574.9	93949.1	132748	78735.3	81559.9	129434	132374	129805	110536	117089	118502	102195	99938.7	110517	69033.3	39225.8	19568.2	103491	89904	84479.6	81599.4	80151.1	157708	86211.4	75428.4	134323	83960.6	91203.6	83974.6	85802.6	92953.7	100266	84906.3
52	80799	94226.9	82052.7	79629.4	79237.2	74689	90273.6	94831	134676	79629.4	82052.7	131909	134722	132782	112627	120317	121358	104469	102393	113008	69158.4	39374.1	19506.9	103780	90203.4	84617.9	82019.1	80628.6	159361	86624.1	75368.1	134125	83723.7	91247.6	84156.5	86428.4	93088.6	100632	85322.8
53	81349.4	95103.5	83107.6	79861.5	79548.8	75199	90959.1	95493.1	136475	79861.5	83107.6	133866	136583	135393	115092	122915	123953	105959	104696	115197	68962.7	39285.2	19650.3	103955	90016.9	84746.1	81760.4	80342.9	160924	86606.5	75530	134607	84189.5	91440	84395.8	86555.7	93495.4	100779	85632.6
54	81519.3	95445.8	83302.5	80294.6	80124.8	75799.8	91474.9	96091.4	138234	80294.6	83302.5	135756	138314	137663	116672	124696	126336	108144	106881	117569	69194.4	39285.3	19598.8	104244	90577.5	84948.8	81894.8	80758.3	161388	86799.1	75630.4	134969	83925.1	91373.6	84457.7	86629.2	93498.9	101055	86014.8
55	81876.3	95873.5	83650.9	80364.5	80566.3	76091.6	92272.2	96494	139454	80364.5	83650.9	137503	139864	138828	118454	126739	128289	109664	108836	119237	69318	39384.2	19543.7	104257	90799.1	84891.4	82170.9	80561.6	162677	87569.3	75757	134520	84053.4	91621.1	84637.5	86439.9	93935.6	101063	86409.5

## Sheet: Fig.3h
Time/min	LOD(aM)	Reference
25	666	Res.1
45	41.5	Res.2
30	30	Res.3
90	333	Res.4
120	100	Res.5
40	47.44	Res.6
60	66.4	Res.7
10	400	Res.8
30	166	Res.9
120	216	Res.10
60	13.3	Res.11
60	200	Res.12
45	16.6	Res.13
30	470	Res.14
2	10	This work

## Sheet: Fig.6f
	IAV										IBV
1	37925.8	40181.6	32348.4	41255.1	43207.6	42601.8	42018.2	35072	31337.2	35129.4	41506.3	43948.3	42350.6	45350.6	41879.2	37395.4	48679.2	30933.6	52300.6	37524.9	59051.5	43373.6	41035	51255.6	55418.3	51806.9	54166.1	48703.8	57181.3	48505.3	48414.1	42689.4	49488	54477.2	52913	50161.2	54947.6	67946.5	53766.2	57061
2	38611.3	41250.9	34072	41832	44199.4	42651.2	42558.5	36907.3	32092.8	35375.8	42193.6	44878.3	43405.2	46836.3	41964.8	37532.8	49427.1	31954.8	52664	38035.8	61634.6	43529.8	41584.5	51755.6	55948.7	52006.5	54536.2	49449.4	57846.7	49143.8	49633.6	43507.6	50340	55296.3	53580.5	50712.9	55723.5	69096.5	54577.7	57758.4
3	38920.2	41870.4	35907.3	42313.1	44859.9	42820.2	42586	37507.3	32926.4	35893.1	42580.3	45233.7	43800.7	47690.6	42032.4	37709.8	49613.9	32817.9	52959.3	38301.7	63098.9	43776.2	41985.4	52465.8	56328.8	52654.5	55166.5	50195	58512.1	49782.2	50517.9	44685	51853.1	56778.4	55533.2	52033.3	56499.4	70246.5	56218.3	58455.9
4	39206.6	42388.6	36507.3	42531.7	45154.9	42905.5	42784.5	38511.1	33573.7	36202.5	42838.8	45437.8	43958.7	48093.8	42120.8	37931.1	49862.8	33933.6	53361.2	38624.9	64198	43947.2	42258.4	53068.5	56816.8	53006.5	55678.9	50735.8	58844.8	50320.7	50853.1	44325.7	51191.9	56115.5	54247.9	51264.6	57275.3	71201.2	55389.2	59449.6
5	39452.3	42844.2	37511.1	42716.5	45482.8	43010.2	42818.2	39914.9	34337.2	37515.2	43135.6	45679.4	44161	48489.8	42379.2	38067.2	50015.9	34954.8	53671.7	39035.8	64851.5	44103.4	42558.8	54488.9	57110.9	53483.3	56166.2	51006.2	59012	50420.7	51456.8	45445	52895.9	57799.9	56565.1	52729.9	57305.6	71396.5	57623.2	59153.4
6	39585.3	43258.7	38914.9	42835.5	45685.5	43184.6	43125.5	40149	36092.8	38129.4	43267	45899.5	44327.3	48779.8	43064.8	38113.7	50074.6	35817.9	53962.3	39301.7	65339.4	44343.1	42858.9	55319	58103.8	54326.7	57336.1	51276.7	59346.3	51153.9	52072.6	45143.8	52043.9	56934.7	54915.4	51816.3	58051.2	72546.5	56200.7	60659.6
7	39718.1	43582.1	40149	42918.5	45861.5	43323.2	44612	41202.7	36926.4	39375.8	43459.3	45924.6	44482.6	48981.8	43132.4	38395.4	50191.7	36933.6	54141.8	39624.9	65624.5	44527.4	43158.7	55815.7	58701.8	55009	58047.3	51908.3	59680.7	51059.1	52393.7	45962	53461.4	58573.1	56917.8	53391.6	58827	72844.2	58400.8	59850.8
8	39831.9	43841	40860.9	42976.3	45969.2	43521.2	45206.5	42290.5	37573.7	39893.1	43523.3	46093.9	44623.9	49100.4	43320.8	39032.8	50159.4	37454.8	54300.6	39835.8	65724	44621.3	43558.3	56066.4	59039.7	55252.4	58245	52106.9	60199.2	51697.6	52661.9	46274.9	53892.7	57753.9	55582.8	52368.1	59238.2	73696.5	57012.1	61280.4
9	39920.8	44053.6	41220.6	43052.5	45970.8	43721.1	45630	42970.5	38111	40202.5	43701.4	46144.9	44710.2	49237.2	43694.1	39309.8	50183.3	37617.9	55664	41001.7	65864	44737.2	43758.1	56438.2	59292.7	55481.1	58458.2	52254.4	60347.1	51882.6	52863.6	46462.3	54118.2	59055.3	56250.3	53471.5	59602.9	73756.4	58891.7	60548.3
10	39945.5	44192	41650.3	43008.2	45982.2	44932.1	46040.6	43355	38472.5	40515.2	43674.7	46245.2	44778.2	49263.8	43716.3	39431.1	50157.4	37817.9	55959.3	41301.7	65975.8	44873.6	44058.4	56488.5	59587.9	55580.7	58516.3	52369.2	60532.1	52013.7	52991	46770.3	54293.4	59372.4	57251	52919.8	59641.2	74644.2	57823.6	61809.5
11	39894.8	44274.4	41970.9	42975.6	45996.8	45524.2	46385	43784.2	38882.6	40701.8	43778.8	46224.3	44852.2	49326.6	43674.3	39567.2	50195.2	37915.7	56361.2	41562.2	66054.8	44929.8	44258.6	56587.1	59430.5	55686.1	58492.4	52443.8	60620.7	52127	53114	46707.8	54333.9	59494.7	57496.9	53740.3	59890.9	74802	59223	61245.8
12	39980.2	44402.6	42320.5	43085.6	46030.3	45923.1	46674.3	44106.9	38989.5	40905.2	43737.8	46295.6	44899.7	49388.3	43793.1	39613.7	50195.3	38457.2	56671.7	41835.3	66100.3	45076.2	44558.4	56716.5	59538.2	55659.5	58407.1	52299.1	60755.3	52308	53190	46844	54434.2	59673.9	57531	53886.7	60227.2	74846.5	58635.1	62091.4
13	39959.1	44486.1	42625.9	43023	46062.2	46182.6	46825.1	44354.8	39087.2	40985.4	43803.6	46360.6	44982.5	49438.8	43770.6	39633.8	50184.4	38975.5	56962.3	42056.6	66084.2	45247.2	44776.5	56801	59750	55712.2	58505.5	52356.8	60690.7	52398.2	53247.1	46903.2	54484.1	59821.5	57685.6	53927.4	60378.8	75063.8	59376.4	62219.4
14	39922.9	44555.2	42917.9	43120.9	46078.8	46369.2	47023.4	44514.8	39261.7	41071.5	43811.6	46464.3	44979.1	49462.4	43795.1	39634.1	50138.6	39266.8	57141.8	42177.7	66058.5	45103.4	44801.4	56807.2	59812.3	55690.6	58611.2	52419.1	60717.8	52411.5	53280.3	47020.1	54566.1	59881.5	57835	53837.2	60200.8	75320.3	59446.6	61943.2
15	39976.3	44555.2	43231.9	43173.8	46156.3	46403	47151.7	44654.3	39338.5	41124.2	43796	46443.5	45082.2	49503.6	43811.4	39659.5	50207	39465	57357.1	42305.8	66116.4	45343.1	45046	56930.1	59759.3	55653.1	58602.6	52337	60834.6	52567.5	53315.1	47026.6	54576.6	59907.9	57933.6	53965.7	60588.4	75551.1	59559.6	62367
16	39889.5	44634.1	43462.3	43055.1	46173.2	46498.8	47228.3	44788.5	39420.1	41222.6	43833.9	46566	45150	49535.7	43761.5	39690.6	50200.4	39608.4	57441	42390.9	66096.6	45527.4	45121.3	57012.9	59920	55697.1	58690.5	52357.7	60647	52572.8	53359.2	47122.9	54572.2	59988	57998.6	54080	60640.5	75551.2	59656.8	62461.2
17	39910.8	44634.4	43730.1	43112.8	46165.9	46673	47337	44860.5	39456.5	41288.7	43889.6	46567.3	45228.4	49699.6	43832.9	39651.8	50190.6	39777.2	57549.1	42608.4	66134.2	45621.3	45267.8	57003.7	59629.4	55804.5	58600.5	52502	60873	52565	53412.9	47165.7	54615.4	59927.4	58018.5	54014	60714.4	75771	59657.6	62530.3
18	39985.6	44699.5	43924.5	43176.6	46178.6	46599.5	47397.7	44939.6	39553.2	41374.6	43845.5	46617.7	45186.2	49646.8	43854.2	39663.6	50242	39943.6	57629.5	42635.9	66139.9	45737.2	45363.8	57061.8	59829.6	55699.3	58490.8	52388.8	60867.6	52568.9	53397	47124	54595.1	59910.6	58125.8	54025.5	60847.7	75980	59693.5	62625.8
19	40020.2	44755.1	44084.4	43136.1	46211.1	46645.3	47462.3	44954.7	39618	41389.1	43897.2	46613.1	45314.3	49658.6	44106.4	39676.9	50272	40095.9	57736.8	42604.9	66251	45753.7	45454.6	57089.3	59844.6	55675.7	58539.4	52269.6	60916.3	52621.1	53419.9	47254.3	54551.8	59851.3	57936.6	53987.4	60659.1	76100.5	59761.4	62633
20	39936.2	44810.5	44213.7	43104.3	46272.3	46837.6	47487.8	45033.7	39675.4	41417.1	43970.4	46725.5	45401.9	49715	44066.5	39683.8	50257.6	40289.2	57779.3	42570.2	66204.8	45926	45540.7	57131.3	59851.1	55644.2	58528	52405.8	60677	52636.9	53465.8	47144.3	54578.2	59966.5	58157	54167.8	60808.1	76248.1	59727.9	62640.7
21	40056.3	44843.5	44381.8	43183.4	46248.6	46830.5	47571	45085.8	39707.7	41473.7	44010.3	46839.4	45419.9	49744.9	43921.6	39717	50216.6	40492.3	57857.6	42624.2	66217.5	45983.8	45589.1	57121.3	59788.7	55744.4	58362.2	52329.5	60744	52594	53483.9	47223.4	54531.4	59888.2	58241.1	53903.5	60887	76250.7	59766.1	62610.8
22	40090.5	44951.9	44397.7	43293.2	46361.3	46910.5	47650.5	45106.4	39761.2	41486.7	44094.3	46932.8	45430.6	49806.2	43852.4	39733.7	50249.8	40661.7	57877.5	42616	66137.5	45785.4	45599	57119.1	59814.2	55639.7	58519.8	52465.2	60598	52617.7	53552.5	47283.6	54569.6	59949.3	58219.4	53960.3	60914.8	76473.8	59736.5	62624.4
23	40233.2	45032.9	44678.7	43225.8	46357.4	46972.5	47653.3	45133.5	39790.7	41559.3	44262.6	47186.6	45566	49843.4	43979.8	39736.1	50253.5	40851.1	57907.1	42687.1	66133.4	45931.3	45680.9	57176.5	59795.6	55719.2	58583.3	52392.9	60695.1	52705.8	53575	47311.2	54588.5	60034.7	58307.7	54098.4	60796.8	76456.2	59710	62600
24	40434.6	45228.4	44650.7	43236.2	46380.4	46934.7	47719	45173.4	39802.5	41611.1	44610.5	47581.3	45680.3	49986.6	44220.6	39762.3	50227.6	41035.8	57958.6	42764.6	66202.5	46021.1	45714.9	57297.3	59892.3	55739.7	58482.9	52363.8	60838.9	52587.1	53607.1	47302.7	54660.5	60007.1	58264.7	54070	61001	76517.2	59712.3	62605.3
25	40838.4	45605.6	45041	43377.6	46387.6	47013.4	47811.5	45251.3	39850	41655.9	45190	48289.5	45955.6	50190	44255	39825.8	50327.8	41210.9	58027.9	42907.4	66210.3	46023.5	45786	57373.7	59897.2	55789.9	58506.7	52437.4	60729.1	52709.4	53668.6	47336.3	54631.8	59983.2	58352.5	54086.5	60924.1	76535.6	59757.5	62562.1
26	41646.7	46295	45291.5	43603.1	46412.4	47099.7	47909.2	45371.3	39922.3	41663.5	46325	49492.6	46364.1	50596.6	44332.5	39945.3	50415.8	41428	58091.1	43031.6	66251.6	46128.9	45811.7	57358	59903.2	55751.3	58326.4	52522.6	60704.7	52637.7	53713.8	47432.4	54611.1	60022.2	58471.3	54155.9	61111	76482.7	59766.7	62597.5
27	42999.7	47466.7	45921.6	43914.5	46483.7	47256.3	48129.6	45500.6	40035.4	41781.8	48253.4	51559.8	47239.2	51282.7	44565	40095.5	50586.9	41663.4	58189.3	43111.6	66260.7	46176.8	45886.7	57282.6	59921.9	55779.4	58534.9	52484.9	60657.9	52726.8	53714.7	47434.4	54571	59924.8	58456.7	53982.2	60903.1	76451.1	59775.6	62564.7
28	45325.2	49639.3	46860.6	44748.6	46618.3	47615.8	48416.4	45844.6	40192.9	41933	51373.1	54589	48692.8	52521.4	44838.7	40382.1	50940.5	41920.7	58370.3	43001.1	66422.9	46202.1	45925.3	57439	59912.6	55722.2	58705.7	52527.4	60795.2	52723.1	53761.6	47447	54679.3	60014	58488.5	54163.2	60944.8	76420.9	59810.5	62555.7
29	48714.8	52935.7	48568.3	45984.6	46892.3	48215.4	48976.3	46414.2	40581.3	42187.5	55660.6	58490.4	51047.8	54659	45792.2	40918.2	51593.2	42282.8	58684.3	43441.8	66551.1	46233.5	45980.2	57542	60010	55810.7	58458.2	52442.2	60833.4	52757.3	53847.7	47485.6	54630.7	59993.6	58518.1	54141.4	61152.5	76453.4	59788.6	62649.5
30	52758.8	57260.6	51429.4	48299	47313.4	49359.6	50079	47403.7	41207.8	42670.2	60429.3	62828.6	54491.4	57709.3	47177.8	41876.2	52757.3	42869.4	59165	44078	66840.2	46280.1	46145.1	57587.1	60150.8	55810.3	58597.1	52508	60667.8	52781.7	53898.4	47680.5	54683.3	60100.4	58521.5	54302	61023.6	76426.3	59802	62602.7
31	57054.8	62113.4	55309.8	51705.3	48218.1	51334.8	51980.6	49240.4	42441.1	43625.4	64945.9	67084.5	58754.6	61790.4	49456.6	43499	54672.5	43810.8	60165.7	45077.7	67449.7	46607.7	46321.4	57808.4	60154.2	55977.2	58710.7	52778.8	60661.5	52874.9	53932.8	47703.6	54747.9	60147.3	58704.5	54133.9	61098	76496.2	59865.2	62594.4
32	60687.1	66689.4	59906.2	55994.5	49824.4	54551.4	55022.8	52241.2	44523.1	45260	68294.3	70700.4	63243.6	66265.2	52790.7	45966.8	57650.1	45370.5	62033	47100.8	68532.5	46886.9	46596.3	58110.4	60349.7	56117.2	58873.3	52896	60887.9	53044.2	54078.3	47864.4	54876.7	60242.8	58787.4	54135.6	61266.3	76432.8	59882.5	62588
33	63303.1	70164.4	64617	61025.8	52596.4	58721.2	59269.5	56352.2	47679.2	47965	70657.5	73523.4	67556.9	70622.3	56730.2	49135.9	61660.4	47871.6	64888.4	49992.1	70281.3	47751.2	47175.8	58780.5	60706.6	56410.3	59216.2	53463.6	61094.8	53315.4	54425.6	48147.5	55119.6	60198.5	58725.2	54199.8	61367.7	76563.7	59883.7	62630.4
34	65006.9	72427.6	68563.6	65288.5	56480.2	64064.7	64169.7	61221.3	51730.3	51780	72376.2	75380.5	71409.3	74475.9	61110.5	52869.7	66315.8	51211.8	68928.2	53916.4	73045.1	49275.4	48210.3	59968.9	61411.7	57021.4	60022.4	54280.4	61806.9	53869	54875	48696.4	55469.4	60620.4	59032.5	54332.6	61589.8	76666.4	59934.3	62766.5
35	66555.6	74278.1	71250.7	69066.7	61323.5	69156.4	69177.8	65811.8	56038.9	56288.5	73851.8	76681.1	74537.6	77451.4	64762.1	56383.6	71210.2	55324.1	73963.9	58846.1	76790.4	51663.9	49964.6	61842.8	62378.8	58206.1	61050.5	55648.5	62778.4	54887.4	55780.2	49706.4	56301.4	61161.8	59399.7	54710.7	62197.1	76907.8	60142.4	62895.6
36	67626.3	75672.9	73341.2	71141.7	66425.2	73423.6	73249.7	69221.2	59729.4	60662.5	74914.8	77604.4	76983.7	79532.2	67789.5	59463.8	75506.2	59676.1	79302.8	63446	81203.8	55258.4	52766.1	64478.2	64333.4	59993	62947	57886.2	64512.7	56442.6	57338.2	50940.7	57679.3	62103.3	60169.5	55167.3	62880	77311.9	60413.8	63173.1
37	68598.2	76823.5	74766.3	72985.6	70597.4	76268.8	76124.9	71557.7	62463.4	64087.4	75895.2	78248.7	79086.8	80976.6	69885.8	61766	79171.3	63749.2	84490.8	67212.9	86144.8	59760.8	56598.2	67995.1	66844.5	62706.4	65784.5	60889	66834.7	58794.5	59715.9	53095.1	59812.5	63768.9	61420.1	56199.1	64278.4	78289.5	60963.9	63583.3
38	69335.5	77811.7	76069.1	74388.8	73685.6	78243.1	78297.2	73267	64287	66494.7	76743.1	78705.1	80513.2	81967.7	71582.9	63464.2	81779	67347.9	89379.6	69528.8	91296.7	64926.3	61024.7	72159.7	70615.8	66204.4	69466.2	64648.7	70448.5	62068.5	63056.3	56027.1	62830.6	66424.6	63464.9	57874.8	66647.7	79792.8	62033.4	64388.1
39	70018.6	78577.8	77115.3	75441.4	75747.4	79845.2	79815.8	74722	65769.4	68094.3	77468.4	79063.3	81500.1	82608.4	72506.9	64591.6	83645.6	70435.4	93835.9	71390.3	96513.6	69332.8	65657.8	76749.4	75118.6	70468.1	73264.4	68761.5	74823.5	65608.9	67172.8	59768.8	66460.8	70006.5	66443.6	60367.8	69942.4	82247.5	63753.9	65731.1
40	70552.4	79232.1	77932.6	76345.6	77424.9	81074.7	81210	75768	66899.2	69559	77952.2	79324.4	82233.4	83099.7	72978.4	65325	84868.6	72862.2	97746	72774.1	101318	72729.2	69686.1	81392.7	79573.7	75084.4	77332.1	73112.7	79942.7	69673.1	71817.7	63576.2	70629.7	74293.4	70168	63684.7	74169.8	85872.7	66389.3	67906.6
41	71044.5	79837.7	78616.8	77026.4	78870.1	82212.1	82197.6	76781.8	67855.9	70624	78494.1	79639.8	82825	83439.6	73425.6	65925	85583.2	74679.9	101171	73748.1	106118	74897.1	73032.6	86144.5	84291.7	79583.3	81712.9	77532.7	84678.5	73939.6	76692.2	67672.2	75121.7	79219.8	74614.1	67626.5	78930	89835	69984.7	71054.2
42	71448.3	80376.3	79306.4	77545.5	79976.7	83137.4	83127.2	77543.2	68677.9	71588.4	79101.5	79752.6	83124.4	83781.7	73733.1	66285.1	86049.9	75980	104038	75023.1	110519	76768.6	75404	90742.4	89249	84369	86305.1	81991.9	89936.1	78189.6	81630.4	71671.1	79503.9	84143.2	79241.2	71875.2	84165	94539.2	74400.6	75027.9
43	71940	80863.4	79764.2	78215	80757.3	83904.2	83912.4	78283.8	69369.3	72444	79419.5	80070.2	83426.2	83914.1	74009	66484.1	86417.8	76896.9	106379	75767	114571	78007.5	77096.2	95046.6	93824	88744.4	89997.3	85947.8	94883.5	82185.2	86453.1	75492.1	83961.7	89191.9	83963.5	76344.6	89450.2	99463.4	79336.7	79698.4
44	72199.7	81300.2	80356.5	78896.1	81412.3	84582.8	84602.3	78931.2	69875.7	73057.3	79843.3	80121.9	83583.6	84202.6	74131.7	66778.2	86715.4	77587.3	108438	76470.7	118634	79230.9	78142	99187.6	98496	93106.5	93719.7	89745.8	99680.1	86053	91149.7	79453.5	88181.1	94097.5	88569	81035.3	94801.5	104455	84467	84566.8
45	72588.9	81754.2	80752.9	79317.6	82091	85263.4	85135.7	79534.2	70383.3	73609.3	80289.9	80308.5	83830.1	84281	74406.1	66909.4	86934.4	78060.6	109968	77036.1	121957	79988	78875.9	103181	102661	97079.1	98005.8	93645	104306	89686.3	95371.8	82830.1	92234.2	98767.7	93112.1	85352.3	99973.1	109446	89625.2	89722.1
46	72915.6	82097.4	81178.7	79725.5	82726.7	85941.2	85581.2	79936.1	70798.9	74119.8	80611.1	80439.7	84022.3	84455.5	74572.4	67084.2	87301.7	78404.4	111213	77589.1	125142	81050.9	79409.3	106633	106865	100693	101051	97009.9	108822	93330.2	99344.9	86058.7	96068.5	103367	97535.8	89360.4	104440	114191	94664.9	94504.1
47	73186.7	82424.4	81637	80093.1	83373.1	86270.4	85996.5	80317.5	71298	74583.7	80858.7	80684.4	84141.1	84659.3	74594.1	67252	87339.2	78617.2	112112	78129.6	127936	81899.8	79809.3	110137	110370	104128	104207	100059	112489	96592.5	103071	89209.6	99482.5	107378	101380	93562.7	109313	118619	99389.1	99300.4
48	73554.4	82743.7	81895.9	80548.2	83858	86698.4	86469.2	80694.9	71617.7	75084.9	81142.6	80852.5	84301.1	84767.4	74893.6	67272.2	87487.4	78863	112792	78675.2	130490	82448.9	80146	113031	113916	107254	106791	102887	116256	99515.1	106444	91947.4	102746	111075	105184	97096.9	113171	122742	104055	104003
49	73722	83006.3	82188.6	80786.7	84262.9	87028.2	86986.6	81136.2	72023.9	75440.2	81417.9	81059.3	84540.2	84929.2	75023	67415.6	87509.8	79041.1	113282	78715.5	132809	82860.4	80370.5	115832	116720	110221	109638	105617	119415	102235	109407	94610.3	105455	114380	108510	100535	117345	126635	108192	108249
50	73910.2	83272.3	82570.3	81059.3	84637.8	87659.1	87255.6	81548.2	72272	75773.5	81738.3	81178.9	84775.7	85026.1	75237	67457.4	87783.9	79233.3	113817	79434.8	134746	83519.1	80575.5	118382	119577	112802	112135	107787	122368	104484	112174	96680.5	108210	117529	111707	103888	120483	130114	112044	112224
51	74107.1	83570.6	82820.8	81238.5	84959.5	87885.4	87655.5	81837.5	72596.9	76179.4	81940.3	81379.2	84985.2	85200.1	75365.6	67609.7	87911.3	79358.7	114124	79684	136621	83693.2	80789.5	120505	122254	114945	114490	109863	124871	106771	114567	98739.2	110692	120661	114329	106639	123622	133445	115589	115799
52	74386.6	83800	83166.4	81551.3	85377.7	88252.6	87899.6	82177.1	72879.8	76442.7	82152.2	81539.5	85200.2	85240.9	75434	67660.9	88132.1	79555.4	114491	80123.7	138039	84072.5	80929.5	122570	124204	117101	116043	111654	127489	108659	116698	100720	112787	122989	116898	109005	126685	136130	118750	118964
53	74536.9	84022.6	83329.3	81641.9	85740.4	88449.6	88181.4	82384.4	73054.4	76788.5	82369.6	81619.9	85387.1	85469.8	75684.3	67783.4	88360.5	79743.2	114889	80395.4	139376	84563.7	81021.8	124323	126431	118803	117811	113324	129690	110447	118498	102421	114743	125332	119363	111412	129065	138986	121588	121913
54	74757.7	84229.3	83532.5	82016	85923.5	88768.4	88425.2	82624.6	73386	77050.9	82580.4	81786.7	85622.6	85591.1	75750.7	67829.7	88357.8	79855.6	115061	80474.4	140690	84987	81273.3	125830	127734	120455	119609	114871	131596	112027	120151	103603	116254	127234	121340	113445	131643	141176	124198	124770
55	74847.9	84436.9	83706.4	82144.1	86168.9	89036.2	88694.2	82814.9	73624.3	77248.6	82823.4	81744.8	85525.2	85666.1	75880.6	67909	88627.6	80044.5	115410	80777	141682	85554.7	81330.4	127075	129402	121517	121295	116043	132852	113507	121445	105194	117990	129009	123297	115364	133603	143264	126447	127173
56	74995.5	84568.5	83935.1	82370.7	86425.8	89190.2	88934.6	83103.7	73780.6	77577.9	82895.8	82048.6	85797.2	85662.2	75811.3	68052.1	88638.2	80135.3	115717	81020.9	142297	85611.9	81512.2	128274	130797	122848	122403	117133	134613	114548	122787	105941	119145	130416	124689	116854	135400	144990	128430	129440
57	75140.5	84819.6	84042.7	82522.8	86710.2	89342.4	89102.4	83290.6	73978.5	77744.1	83169.2	82175.8	85909.5	85852.6	76164.6	68166.4	88886.7	80294.7	115920	81447.7	143072	85654	81683.6	129323	132115	124018	123268	117994	135824	115724	123666	106911	120240	131906	126296	118295	136902	146632	130176	131214
58	75302.1	84965.2	84348.9	82523.6	86877.3	89323.4	89340.2	83487.7	74147.4	77974.1	83336.9	82264.7	86091.5	85939.6	76076.8	68188.9	89060.7	80428.6	116246	81530.2	143710	85745.6	81826.9	130256	133158	124797	124108	118996	136907	116654	124630	107461	121423	133181	127389	119725	138946	147939	131773	132890
59	75450.2	85109.7	84556.1	82901.1	87146.8	89584.6	89522.8	83660.4	74297.7	78121.2	83434	82516.8	86318.4	85990.2	76290.6	68258.7	89074.4	80568.9	116404	81537.7	144445	86118.1	81970.1	131207	134043	125960	124923	119611	137635	117455	125395	108209	122106	133882	128436	120840	139515	149184	133077	134354
60	75569.6	85201.8	84630.4	82806.5	87480.5	89632.4	89680.8	83834.4	74442	78400.3	83548.3	82549.6	86454.8	86178.5	76256.6	68340.7	89305.2	80685.3	116674	81894.4	144926	86411.1	82126	131943	134575	126543	125722	120281	138533	118251	126012	108823	122828	134991	129397	121479	140901	150204	134220	135549

## Sheet: Supplementary Fig. 2b
Probe Concentration/μM	average value	error (+)	error(-)
0.6	0	8.3	0
0.7	33.3	8.3	8.3
0.8	66.6	8.3	8.3
0.9	66.6	8.3	8.3
1	100	0	8.3

## Sheet: Supplementary Fig. 3a1
	Hegiht
	0.1
	0.12
	0.1
	0.1
	0.12			Parameters
	0.11					Value	Standard Error		Descriptive Statistics
	0.11			Count	y0	0.67273	0.23521			N total	Mean	Standard Deviation	Sum	Minimum	Median	Maximum
	0.12			Count	xc	0.12185	0.000565942		B	27	0.11593	0.01474	3.13	0.08	0.12	0.15
	0.12			Count	w	0.01969	0.00138
	0.15			Count	A	0.20946	0.01616
	0.08			Count	sigma	0.00985	0.000688416
	0.13			Count	FWHM	0.02318	0.00162
	0.14			Count	Height	8.48779	0.45455
	0.11
	0.11
	0.12
	0.13
	0.12
	0.11
	0.12
	0.12
	0.12
	0.11
	0.13
	0.13
	0.09
	0.11

## Sheet: Supplementary Fig. 3a2
a2	Hegiht
	0.16
	0.17			Parameters
	0.15					Value	Standard Error		Descriptive Statistics
	0.17			Count	y0	0.69029	0.61849			N total	Mean	Standard Deviation	Sum	Minimum	Median	Maximum
	0.17			Count	xc	0.17078	0.000640511		B	22	0.16364	0.00902	3.6	0.14	0.165	0.18
	0.17			Count	w	0.01225	0.0031
	0.16			Count	A	0.17882	0.02941
	0.15			Count	sigma	0.00613	0.00155
	0.17			Count	FWHM	0.01442	0.00365
	0.16			Count	Height	11.6462	1.79313
	0.17
	0.17
	0.17
	0.16
	0.16
	0.17
	0.14
	0.16
	0.16
	0.16
	0.17
	0.18

## Sheet: Supplementary Fig. 3a3
	Hegiht
a3	0.21
	0.2			Parameters
	0.19					Value	Standard Error		Descriptive Statistics
	0.2			Count	y0	1.68952	1.16587			N total	Mean	Standard Deviation	Sum	Minimum	Median	Maximum
	0.2			Count	xc	0.20879	0.00122		B	25	0.204	0.00957	5.1	0.18	0.2	0.22
	0.21			Count	w	0.01157	0.00543
	0.2			Count	A	0.16585	0.04826
	0.18			Count	sigma	0.00579	0.00271
	0.2			Count	FWHM	0.01362	0.00639
	0.21			Count	Height	11.4366	3.16685
	0.21
	0.19
	0.2
	0.2
	0.22
	0.21
	0.21
	0.2
	0.21
	0.2
	0.2
	0.22
	0.22
	0.21
	0.2

## Sheet: Supplementary Fig. 3a4
	Hegiht
	0.26
a4	0.27
	0.26
	0.25				Value	Standard Error		Descriptive Statistics
	0.27		Count	y0	1.17579	0.91814			N total	Mean	Standard Deviation	Sum	Minimum	Median	Maximum
	0.27		Count	xc	0.27248	0.00176		B	20	0.2665	0.0104	5.33	0.25	0.27	0.29
	0.27		Count	w	0.01228	0.00414
	0.26		Count	A	0.12945	0.04161
	0.27		Count	sigma	0.00614	0.00207
	0.26		Count	FWHM	0.01446	0.00488
	0.25		Count	Height	8.41061	1.96675
	0.27
	0.27
	0.27
	0.27
	0.25
	0.28
	0.26
	0.28
	0.29

## Sheet: Supplementary Fig. 4a1
61.78
72.37		Parameters
66.19				Value	Standard Error			Descriptive Statistics
69.72		Count	y0	4.14851	2.17619				N total	Mean	Standard Deviation	Sum	Minimum	Median	Maximum
67.08		Count	xc	68.6913	1.153			B	76	69.2721	8.7734	5264.68	50.31	68.84	86.5
69.72		Count	w	12.5993	3.60194
70.61		Count	A	214.364	79.6728
67.08		Count	sigma	6.29964	1.80097
70.61		Count	FWHM	14.8345	4.24096
62.66		Count	Height	13.5752	2.67171
81.2
77.67
71.49
64.43
62.67
67.08
63.57
63.54
72.37
55.84
73.25
72.37
75.02
68.84
65.31
56.07
71.49
66.2
86.5
66.19
50.31
51.2
51.2
56.48
54.72
65.31
67.96
63.54
61.78
84.74
67.08
54.72
67.08
59.78
73.25
67.08
59.91
83.84
64.43
68.84
73.26
79.08
79.08
84.73
75.02
82.08
84.73
75.02
79.44
78.9
84.73
75.02
67.08
64.43
68.84
72.37
75.02
59.13
59.13
64.43
68.84
71.49
73.25
69.72
82.08
85.61

## Sheet: Supplementary Fig. 4a2
100.97
99.2			Parameters
101.85					Value	Standard Error		Descriptive Statistics
99.89			Count	y0	3.87428	1.66419			N total	Mean	Standard Deviation	Sum	Minimum	Median	Maximum
94.93			Count	xc	93.2327	0.54477		B	63	92.2187	5.77359	5809.78	77.93	92.8	101.85
97.76			Count	w	7.36952	1.19464
92.1			Count	A	198.826	39.8713
98.47			Count	sigma	3.68476	0.59732
96.35			Count	FWHM	8.67695	1.40658
91.39			Count	Height	21.5265	2.87016
92.1
100.6
94.22
94.22
95.64
91.39
84.3
82.18
77.93
87.84
92.8
92.09
96.35
90.68
88.55
89.97
82.89
87.85
81.47
78.64
82.9
89.26
91.39
87.84
92.09
99.89
87.14
93.51
94.22
94.22
94.22
83.6
87.14
94.93
96.35
91.39
93.51
80.76
89.26
96.35
90.68
88.56
101.31
99.18
92.81
96.41
92.23
94.23
99.3
97.78
97.09
93.51
92.1

[truncated: 20 more sheets: Supplementary Fig. 4a3, Supplementary Fig. 5, Supplementary Fig. 6, Supplementary Fig. 7a, Supplementary Fig. 7b, Supplementary Fig. 8a, Supplementary Fig. 8b, Supplementary Fig. 9, Supplementary Fig. 10, Supplementary Fig. 11, Supplementary Fig. 12a, Supplementary Fig. 14a, Supplementary Fig. 14b, Supplementary Fig. 15, Supplementary Fig. 16, Supplementary Fig. 17, Supplementary Fig. 18, Supplementary Fig. 19, Supplementary Fig. 20a, Supplementary Fig. 20c]
