# Supplementary material for: Visual “Dam-Break Drainage” Nucleic Acid Chips: Family-Affordable Platform for Rapid and Ultrasensitive Pathogens Detection
Source: Research Square preprint supplement (doi:10.21203/rs.3.rs-8576721/v1), 2026-01-19
Supplement: Supplementary file 2 [file 623d7ec37a79d53a049a37af.docx]

Supplementary Materials for

Visual “Dam-Break Drainage” Nucleic Acid Chips: Family-Affordable Platform for Rapid and Ultrasensitive Pathogens Detection

Kai Liu1†, Xiang Li1†, Meng Zhao1, Zhuo Yang1, Jingshuai Wen1, Jinpeng Liu1, Haoli Zhang1, Yuecan Zhao1, Yang Sun1*, Zhengping Li1*

Corresponding author: lzpbd@ustb.edu.cn

**The file includes:**

Supplementary Text

Supplementary Figs. 1 to 18

Supplementary Tables 1 to 7

Supplementary Movies 1 to 6

References

**Supplementary Text**

**The clinical sample pretreatment protocol**

We systematically investigated the RNase activity in lysates obtained from SARS-CoV-2 clinical samples subjected to different pretreatment methods. For throat swabs, four approaches were compared: room-temperature lysis (10 min), heat lysis (95°C, 10 min), room-temperature lysis with an RNase inhibitor (RRI), and heat lysis with RRI. Room-temperature lysis produced lysates with high RNase activity, leading to substantial RNA degradation. In contrast, heat lysis or room-temperature lysis with RRI only partially inhibited RNase activity; complete suppression was achieved only when both heat lysis and RRI were combined (Fig. S7a). For nasal swabs, both room-temperature and heated lysis yielded lysates exhibiting high RNase activity. This activity was effectively eliminated by supplementing either lysate with RRI (Fig. S8a). Given the reliance of our chip on CRISPR-Cas13a, we further examined whether the lysates with completely suppressed RNase activity would interfere with Cas13a activity. When these lysates were introduced into the CRISPR-Cas13a solution containing RRI, the RNase activity of Cas13a was not inhibited (Fig. S7b and S8b). Considering that SARS-CoV-2 nasal swabs were selected as the clinical testing samples, we next evaluated the effect of different lysis methods on RNA extraction efficiency. The lysate obtained from the same SARS-CoV-2–positive nasal swab sample was divided into two portions, which were lysed either at room temperature for 10 min or by heating at 95°C for 10 min. The resulting lysates were serially diluted (1, 1/2, 1/4, 1/6) and analyzed using an RT–PCR system containing RRI. At the same dilution levels, the room-temperature lysates consistently yielded lower Ct values than the heat-lysed ones, indicating higher RNA extraction efficiency (Fig. S9). Finally, we assessed whether varying concentrations of RRI would affect Cas13a RNase activity. As shown in Fig. S10, adding different volumes of RRI (0.02, 0.1, 0.2, 0.4, or 0.6 µL per 10 µL reaction) did not inhibit Cas13a RNase activity.


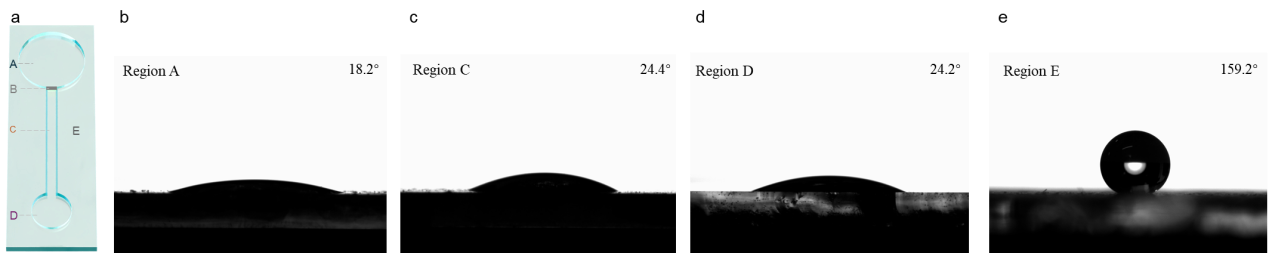


**Supplementary Fig. 1.** **Wettability Characterization of the designed functional regions.** **(a)** Chip structure. **(b)** The contact angle of Region A (the sample reservoir) is 18.2°. **(c)** The contact angle of Region C (the channel) is 24.4°. **(d)** The contact angle of Region D (the sample reservoir) is 24.2°. **(e)** The contact angle of Region E (the exterior surface) is 159.2°.


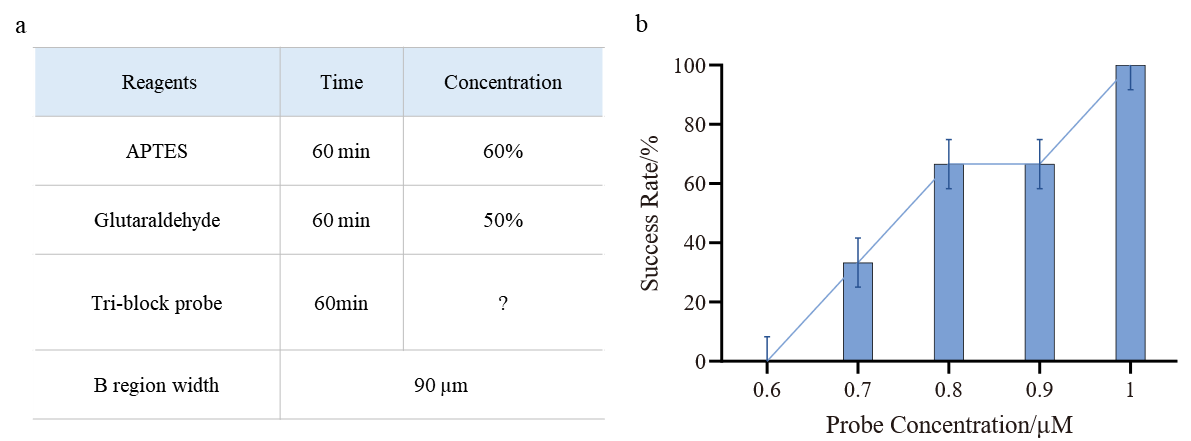


**Supplementary Fig. 2. Optimization of chip surface modification conditions. (a)** Summary table of the chip surface-modification parameters, including the reagents, reaction time, and corresponding working concentrations. **(b)** Success rate of the sample reservoir successfully confined 100 µL water as a function of the probe addition concentration during the modification procedure. Note: Success rate refers to the proportion of chips whose A region successfully confined 100 µL of water among 12 chips.


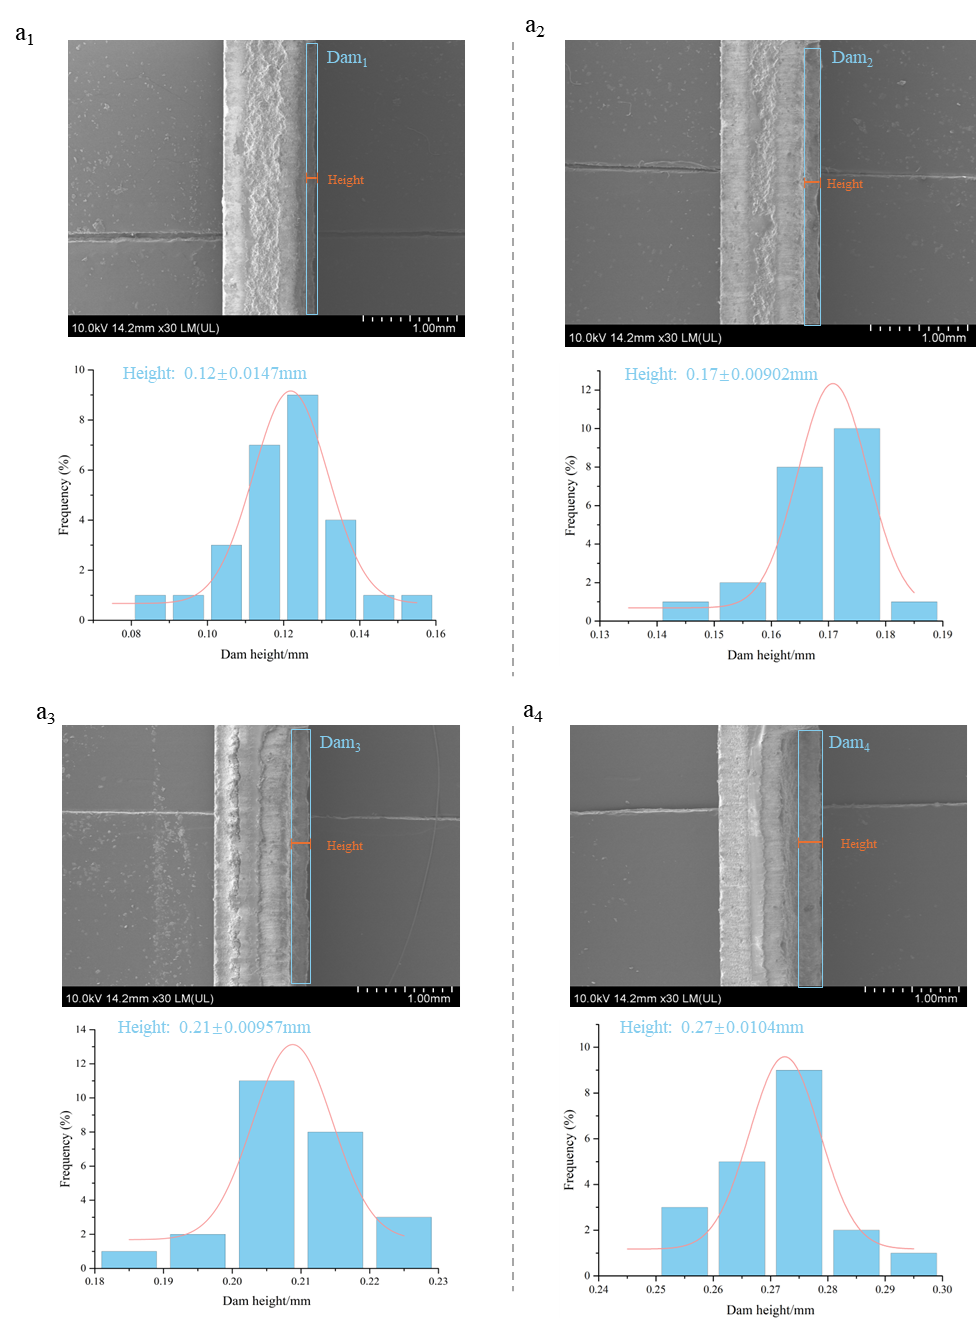


**Supplementary Fig. 3. Scanning electron microscopy characterization of physical dam height.** Four physical dams with a fixed width of 0.9 mm were fabricated at different heights by adjusting the laser etching power: Dam1 **(a1)**, Dam2 **(a2)**, Dam3 **(a3)**, and Dam4 **(a4)**. For each dam, height distributions were obtained from 20 measurements and presented as histograms fitted with Gaussian curves. The average heights were 0.12 ± 0.0147 mm (Dam1), 0.17 ± 0.00902 mm (Dam2), 0.21 ± 0.00957 mm (Dam3) and 0.27 ± 0.0104 mm (Dam4), respectively.


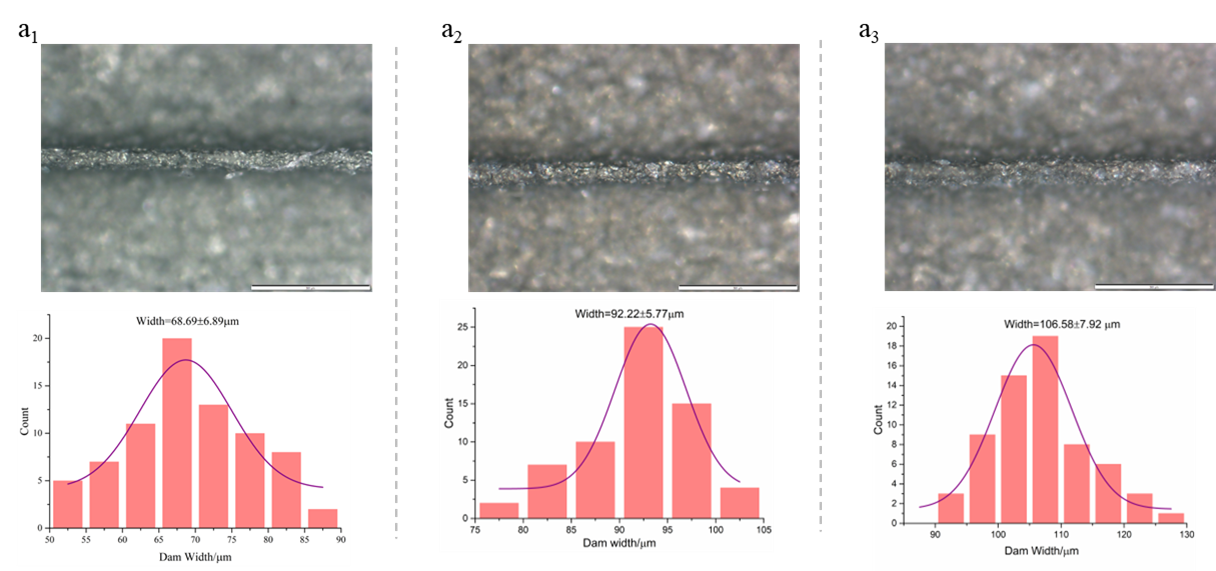


**Supplementary Fig. 4. Metallurgical microscopy characterization of physical dam width.** Three ranges of physical dam widths were fabricated at a fixed height of 0.27 mm **(a1-a3)**. For each dam, 60 measurements were collected to generate width distributions, which were presented as histograms and fitted with Gaussian curves. The average widths were 68.69 ± 6.89 µm **(a1)**, 92.22 ± 5.77 µm **(a2)**, and 106.58 ± 7.92 µm **(a3)**.


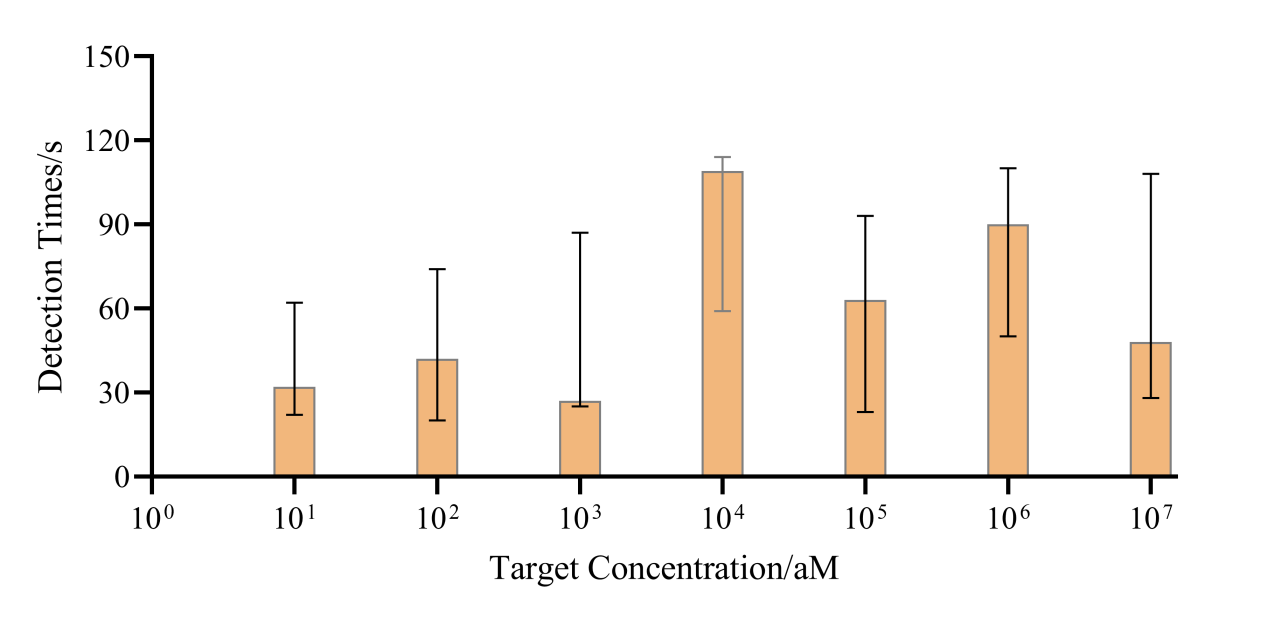


**Supplementary Fig. 5. Statistical analysis of detection times for the single-plex chip in detection of SARS-CoV-2 N gene across concentrations from 10 aM to 10 pM.** All experiments were performed in three technical replicates (n=3), confirming reliable completion of detection within 2 minutes for all tested concentrations.


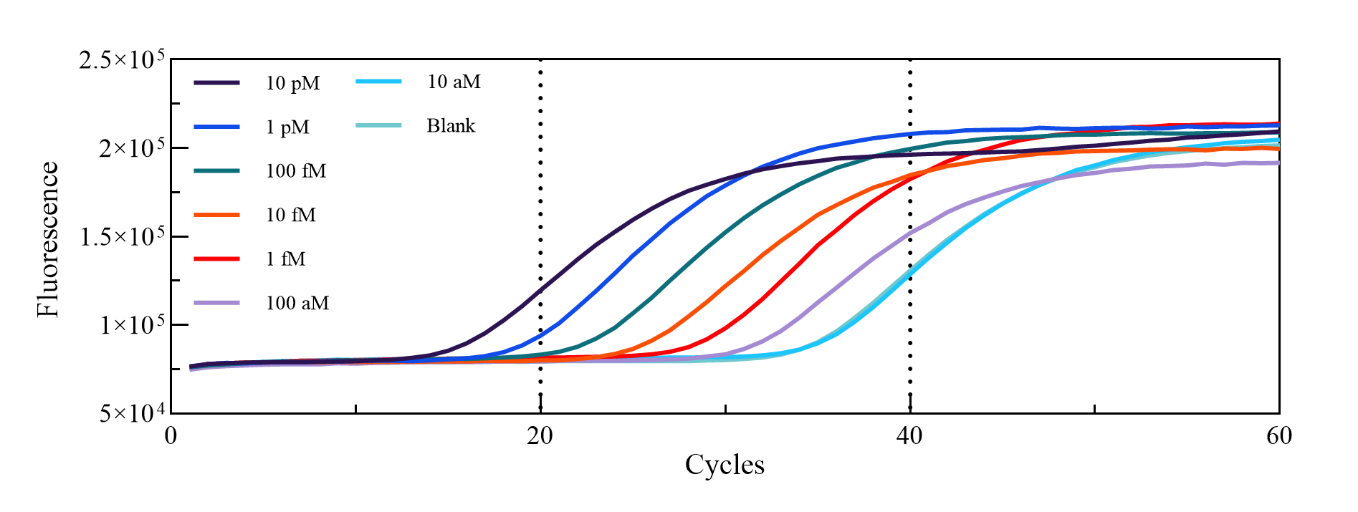
 **Supplementary Fig. 6. RT-PCR results of SARS-CoV-2 N gene in the concentration range of 10aM-10pM.** The limit of detection is 100 aM.


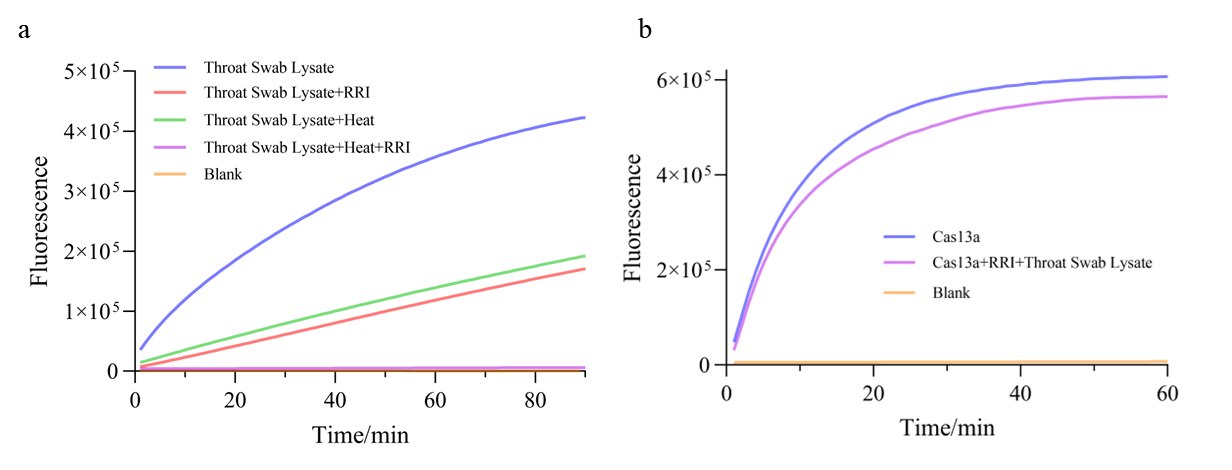


**Supplementary Fig. 7. (a)** RNase activity in throat-swab lysates following different pretreatment methods: (ⅰ) room-temperature lysis, (ⅱ) heat lysis (95℃, 10 min), (ⅲ) room-temperature lysis + RNase inhibitor (RRI) and (ⅳ) heat lysis + RRI. **(b)** Comparison of Cas13a RNase activity between the CRISPR-Cas13a system alone and the system containing throat-swab lysates with RRI.


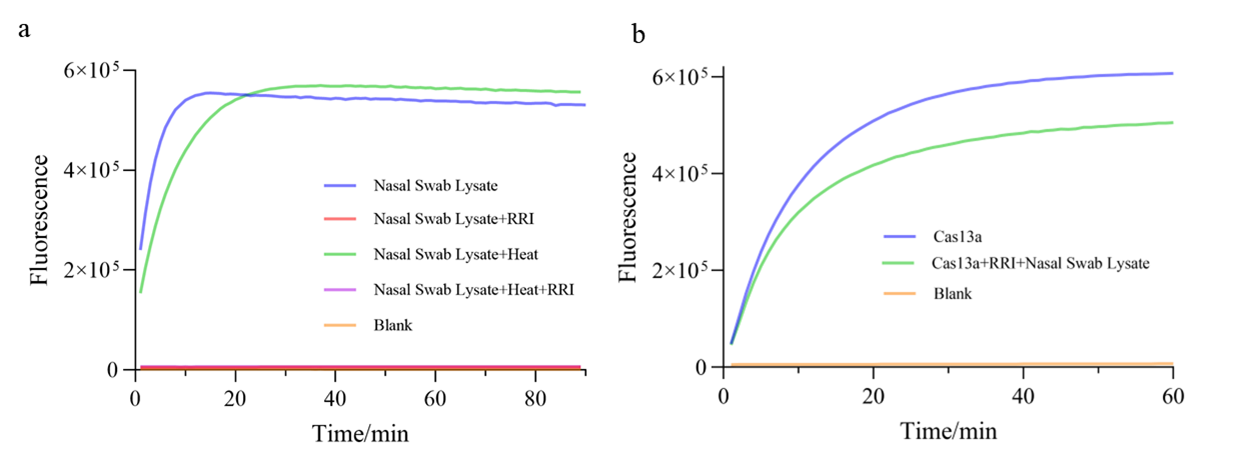


**Supplementary Fig. 8. (a)** RNase activity in nasal-swab lysates following different pretreatment methods: (ⅰ) room-temperature lysis, (ⅱ) heat lysis (95℃, 10 min), (ⅲ) room-temperature lysis + RNase inhibitor (RRI) and (ⅳ) heat lysis + RRI. **(b)** Comparison of Cas13a RNase activity between the CRISPR-Cas13a system alone and the system containing nasal-swab lysates with RRI.


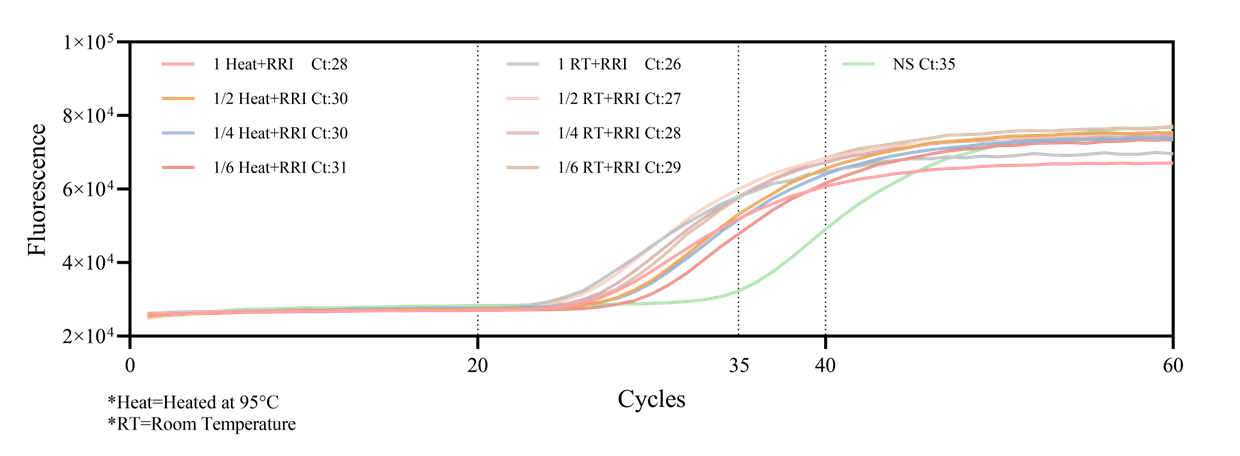


**Supplementary Fig. 9. Comparison of RNA target extraction efficiency from SARS-CoV-2 nasal swabs by heat lysis or room-temperature lysis.**


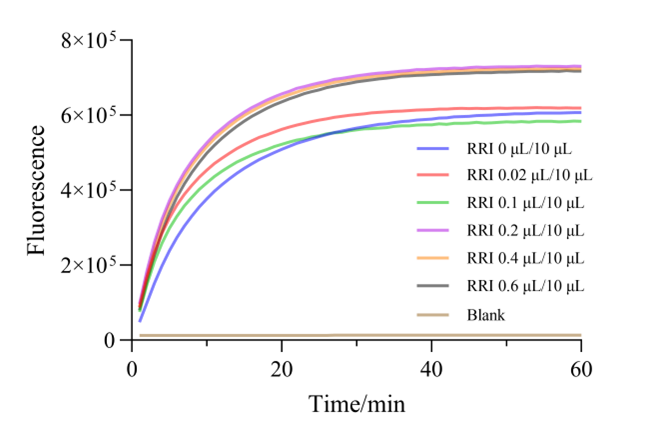


**Supplementary Fig. 10. Comparison of Cas13a RNase activity in the CRISPR–Cas13a system with varying amounts of added RRI.**


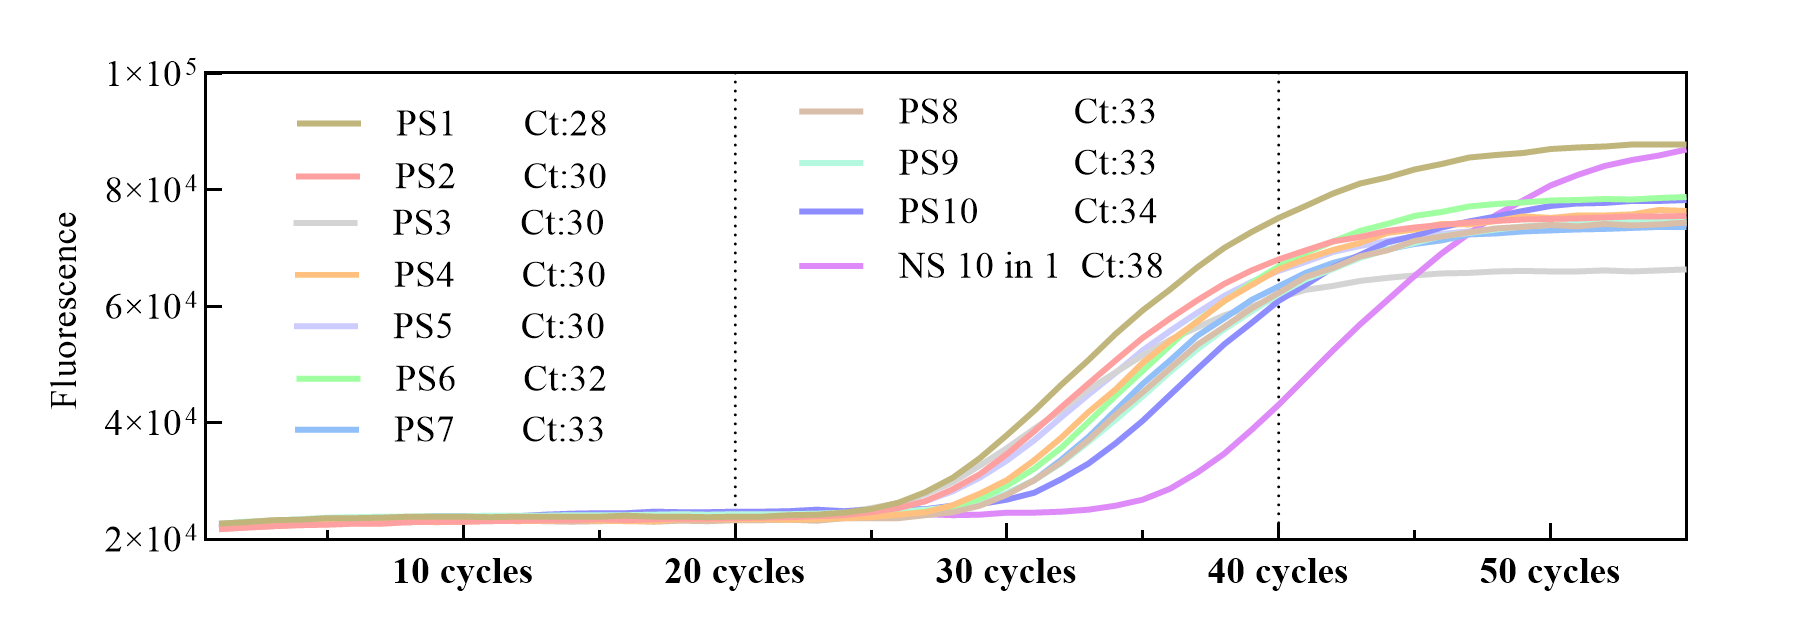


**Supplementary Fig. 11. RT-PCR results of SARS-CoV-2 nasal swabs.**

Notes：PSx indicates the index of each positive sample, while NS 10-in-1 refers to nucleic acids pooled from ten negative samples. The limit of detection is defined as a Ct value of 35.


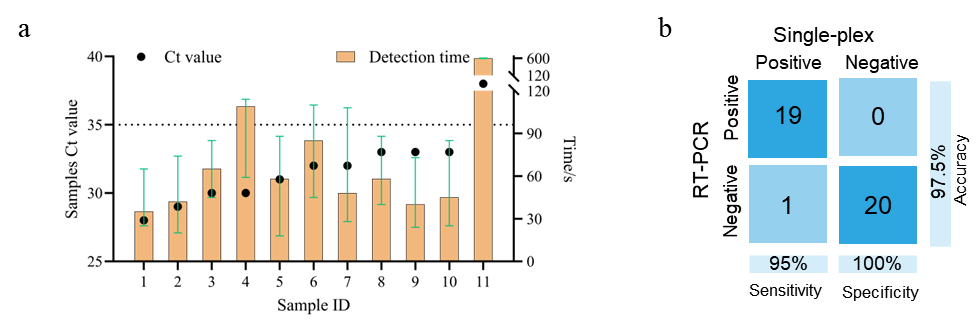


**Supplementary Fig. 12. (a)** The single-plex chip exhibited a detection time of less than 2 minutes for clinical samples with RT-PCR Ct values from 28 to 33. All experiments were performed in three independent measurements (n=3), confirming the robustness of its rapid detection performance (Note: Samples 1-10 represents the order of positive samples, Sample 11 represents the negative sample). **(b)** Confusion matrix analysis of sensitivity and specificity compared with the single-plex chip detection results, showing 95% sensitivity, 100% specificity, and 97.5% accuracy.


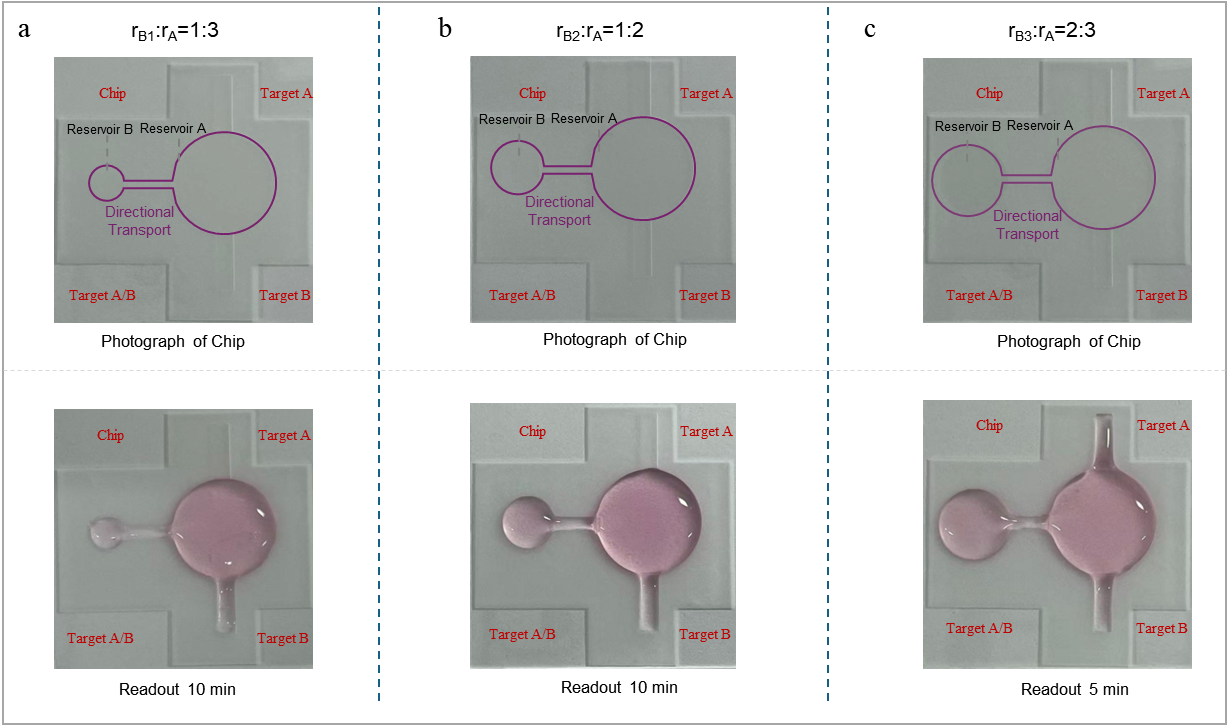


**Supplementary Fig. 13. Self-replenishing performance of the duplex chip under different size ratios between reservoir B (rB) and reservoir A (rA). (a)** When the ratio of rB:rA was 1:3, the duplex chip equipped with the self-replenishment system detected only one target nucleic acid even after 10 minutes. **(b)** When the ratio was 1:2, the chip likewise only detected one target after 10 minutes. **(c)** In contrast, at a ratio of 2:3, the duplex chip successfully completed simultaneous detection of both nucleic acid targets within 5 min.


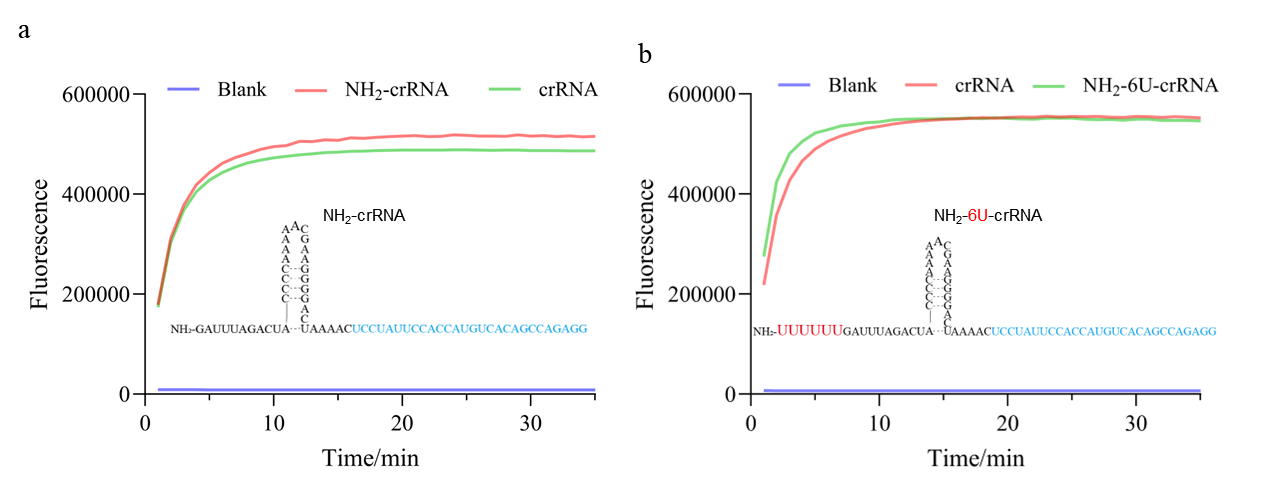


**Supplementary Fig. 14. RNase activity of Cas13a protein complexed with differently modified crRNAs or wild-type crRNA. (a)** RNase activity of Cas13a protein complexed with amino-modified crRNA and wild-type crRNA; **(b)** RNase activity of Cas13a protein complexed with amino-6U-modified crRNA and wild-type crRNA.


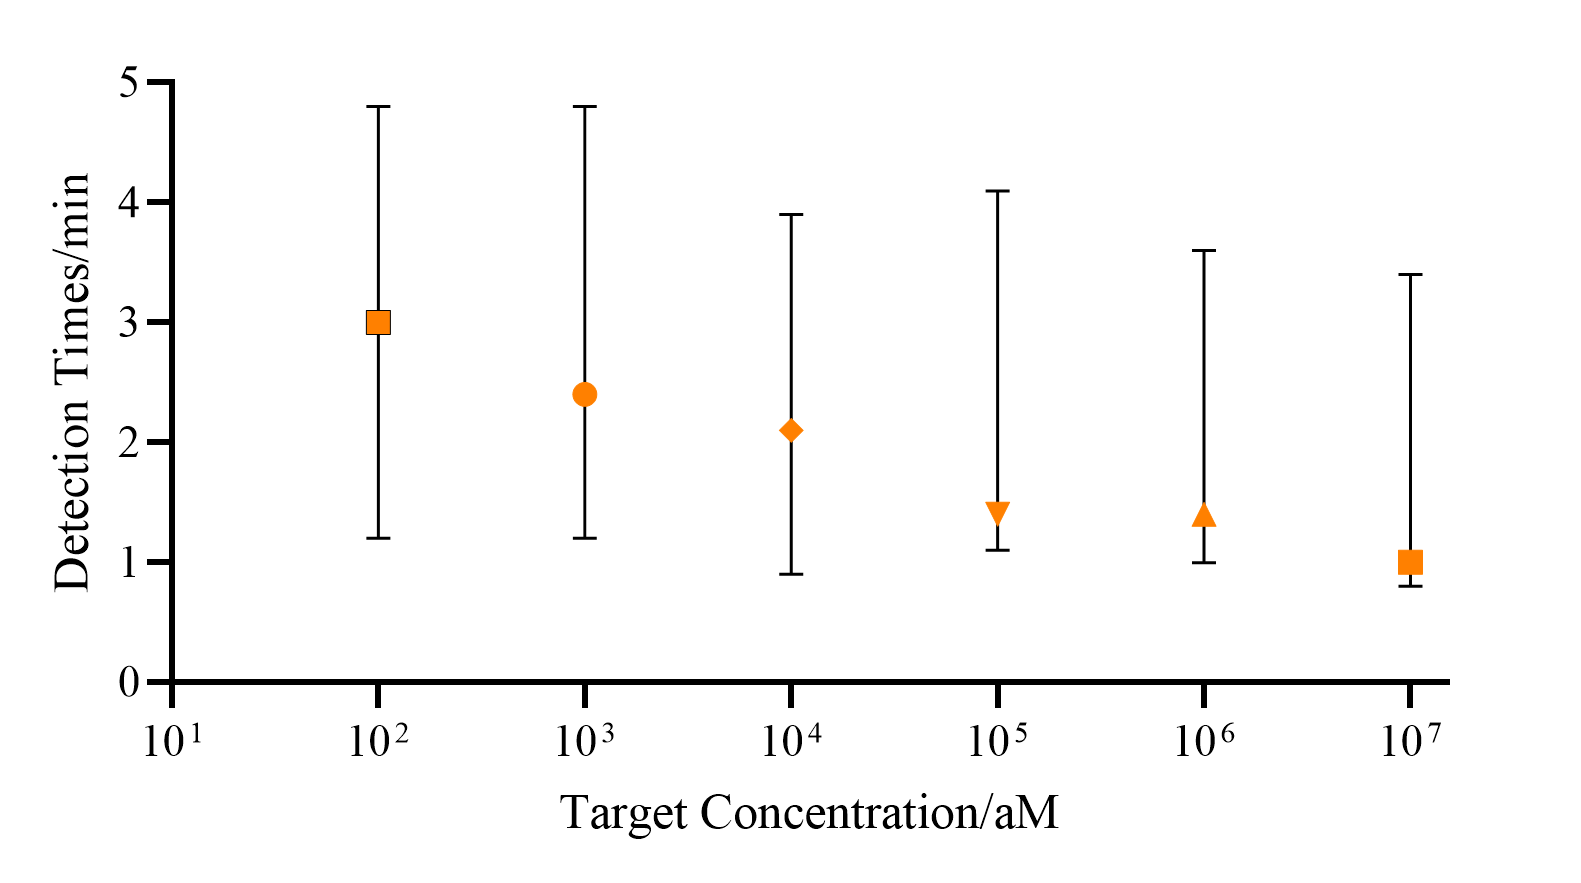
**Supplementary Fig. 15. Statics of detection time for duplex chip in simultaneously analyzing the IAV-PB2 and IBV-PB1 genes.** Detection time of the duplex chip for concurrent analysis of the IAV-PB2 and IBV-PB1 genes over concentrations ranging from 100 aM to 10 pM, with both targets detected within 5 minutes. All measurements were conducted in triplicate (n=3).


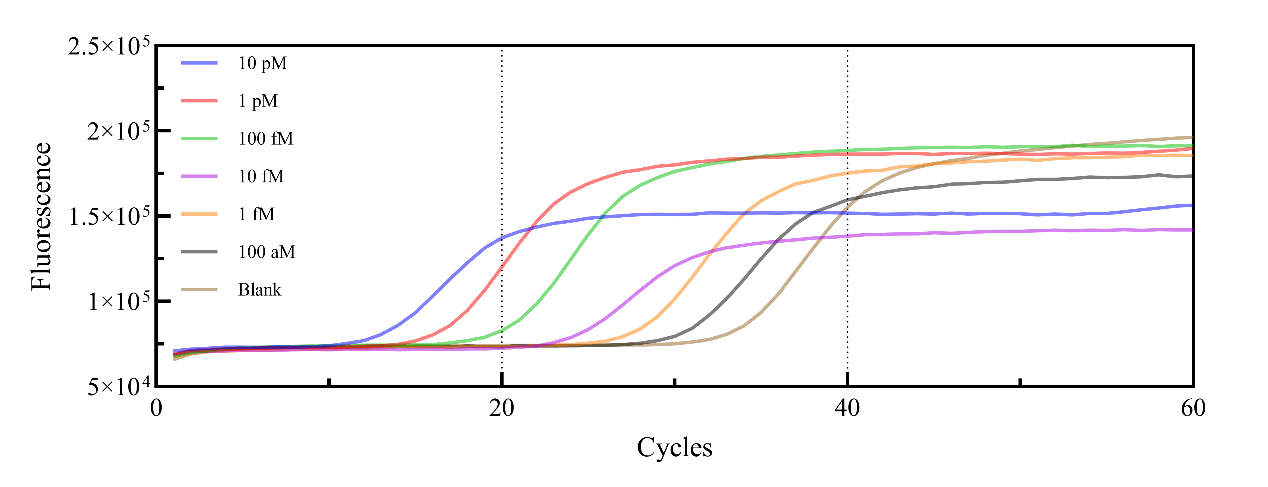


**Supplementary Fig. 16. RT-PCR results of Influenza A virus PB2 gene in the concentration range from 100aM to 10pM.**


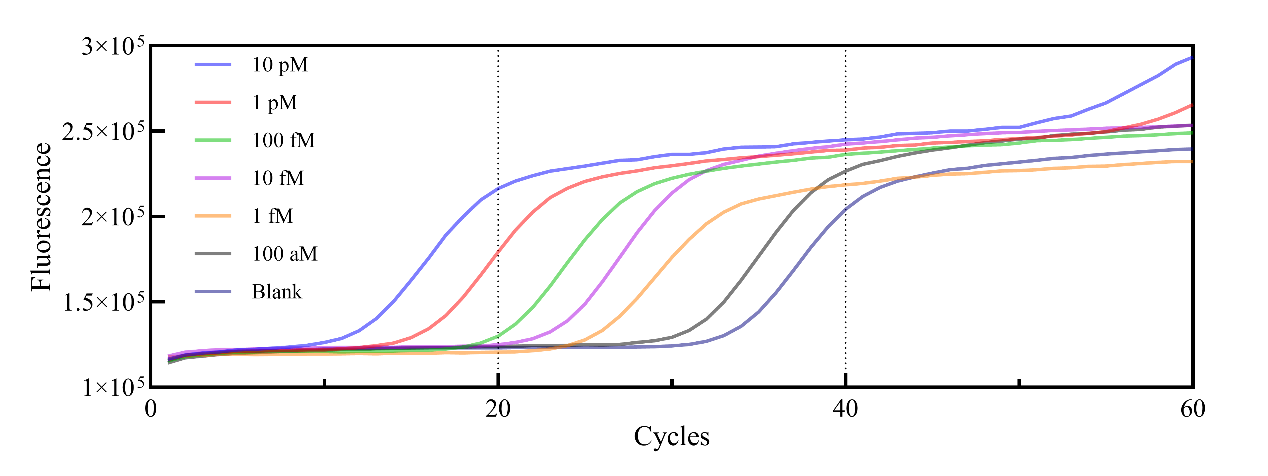


**Supplementary Fig. 17. RT-PCR results of Influenza B virus PB1 gene in the concentration range from 100aM to 10pM.**


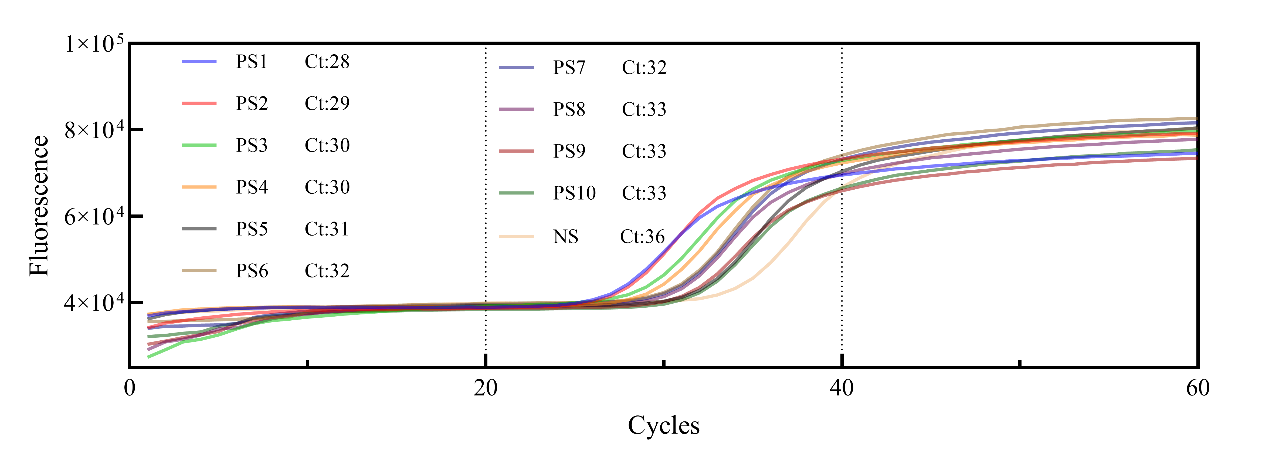


**Supplementary Fig. 18. RT-PCR results of Influenza A virus nasal swabs.**

Note: PSx represents the index value of each positive sample, and NS represents negative sample. The detection limit is defined as a Ct value of 35.


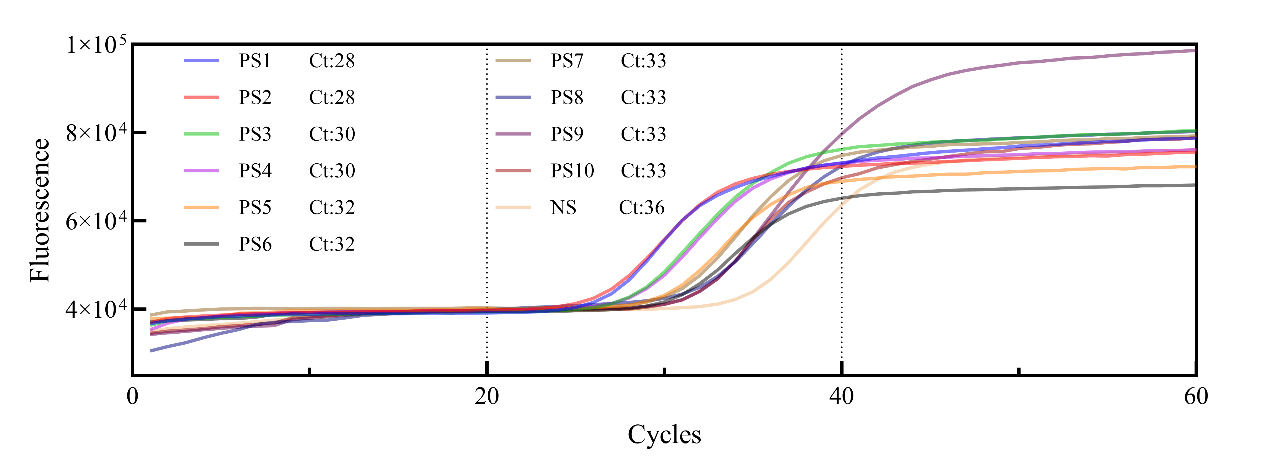


**Supplementary Fig. 19. RT-PCR results of clinical samples of Influenza B virus nasal swabs.**

Note: PSx denotes the numbering of individual positive samples, and NS refers to the negative sample. The detection limit is set at a Ct value of 35.


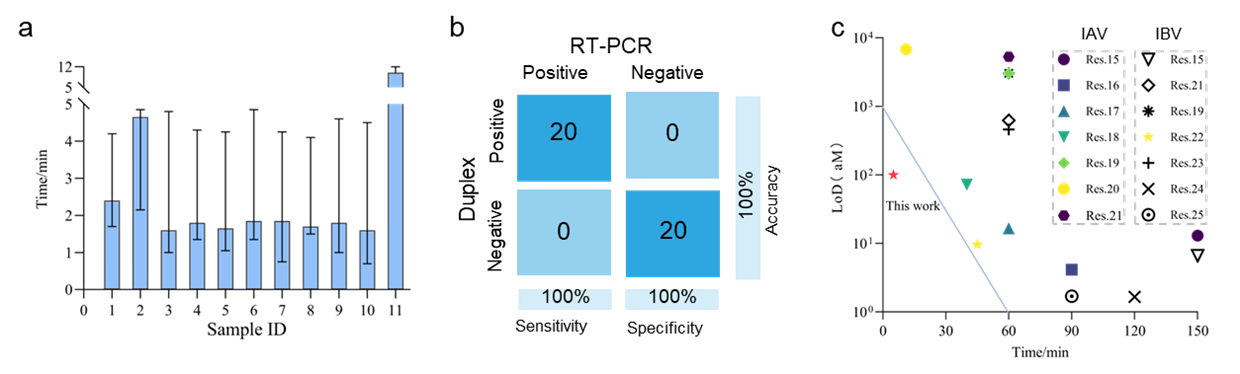


**Supplementary Fig. 20. Performance characterizations of the duplex chip. (a)** Statistical analysis of detection times for the duplex chip in simultaneous detection of IAV and IBV clinical samples. All experiments were performed in three independent measurements (n=3), confirming the robustness of its rapid detection performance (Note: Samples 1-10 represents ten groups of randomly mixed IAV RT-PCR-positive (Ct=28-33) and IBV RT-PCR-positive samples (Ct=28-33), Sample 11 represents the negative sample). **(b)** Confusion matrix analysis relative to clinical RT‑PCR results, demonstrating 100% sensitivity, specificity, and accuracy. **(c)** Comparison of the developed chip with previously reported technologies.


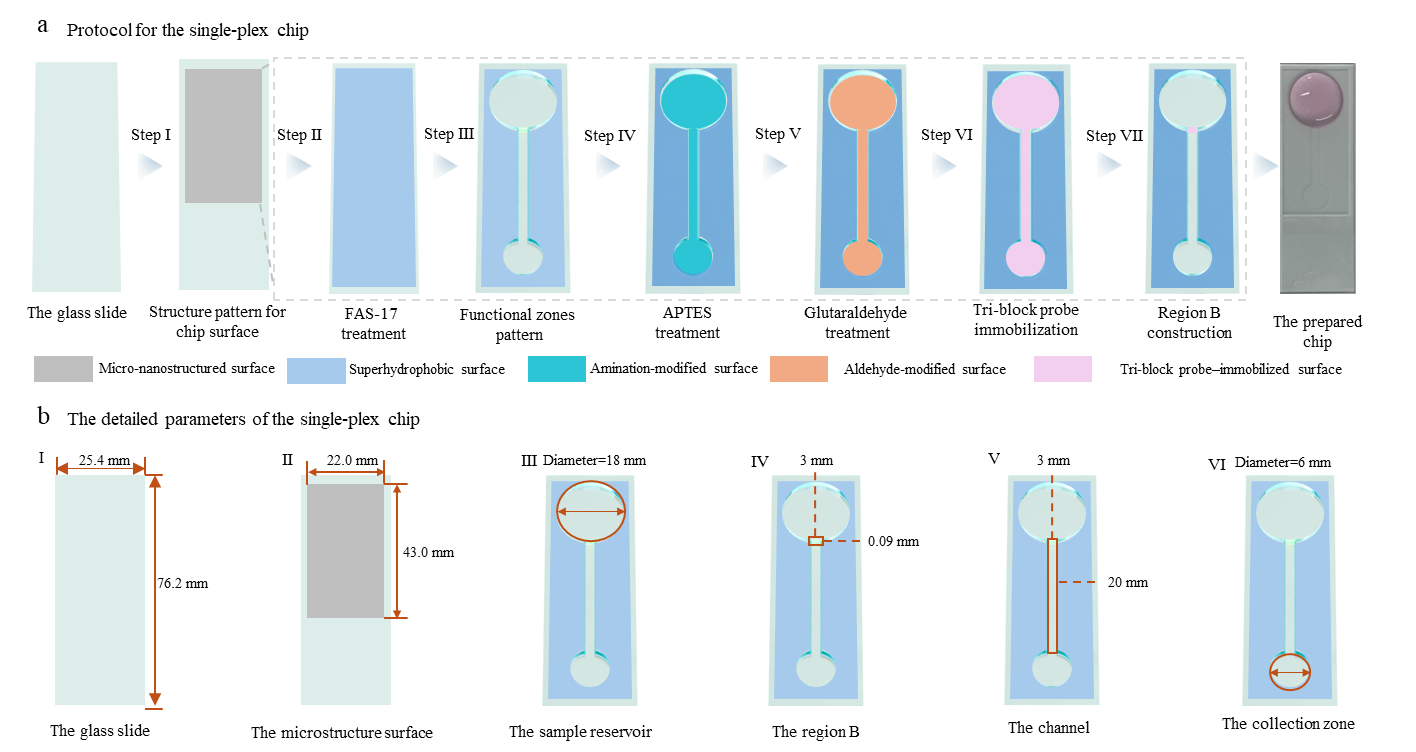


**Supplementary Fig. 21. (a)** Protocol for the single-plex chip. **(b)** The detailed parameters of the single-plex chip.


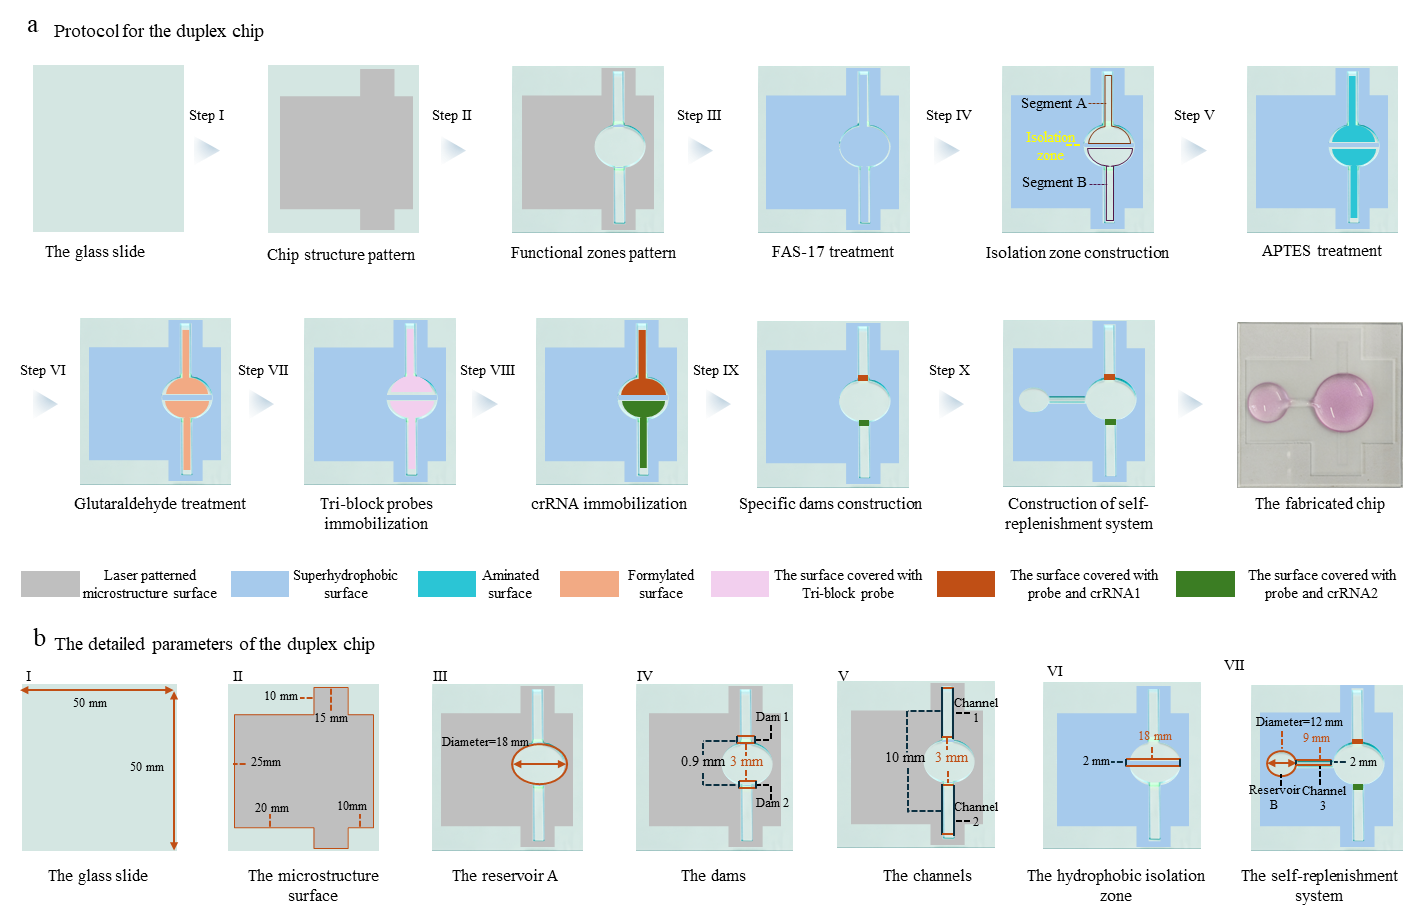


**Supplementary Fig. 22. (a)** Protocol for the duplex chip. **(b)** The detailed parameters of the duplex chip.

**Table S1 Laser parameter settings.**

| Name | Parameter | Name | Parameter |
| --- | --- | --- | --- |
| Operating voltage | 220V | Power | 10 w |
| Laser Scan Speed | 1000 m/s | Q pulse width | 1 µs |
| Current | 1 A | Light-on delay | -100 µs |
| Frequency | 60 KHz | Light-off delay | 200 µs |
| End Delay | 200 µs | Corner Delay | 100 µs |

**Table S2. Performance comparison between the single-plex chip and the reported works in SARS-CoV-2 detection.**

| Target (gene) | Assay time (min) | | Limit of detection (aM) | Refs. |
| --- | --- | --- | --- | --- |
| N | | 25 | 666 | 1 |
| ORF1ab | | 45 | 41.5 | 2 |
| N | | 30 | 30 | 3 |
| S | | 90 | 333 | 4 |
| ORF1ab | | 120 | 100 | 5 |
| N | | 40 | 47.44 | 6 |
| N | | 60 | 66.4 | 7 |
| N | | 10 | 400 | 8 |
| N | | 30 | 166 | 9 |
| N | | 120 | 216 | 10 |
| O and N | | 60 | 13.3 | 11 |
| N | | 60 | 200 | 12 |
| N | | 45 | 16.6 | 13 |
| N | | 30 | 470 | 14 |
| N | | 2 | 10 | This work |

**Table S3. Performance comparison between the duplex chip and the reported works in IAV and IBV detection.**

| pathogen | Target (gene) | Assay time (min) | Limit of detection (aM) | Refs. |
| --- | --- | --- | --- | --- |
| IAV | M | 150 | 13 | 15 |
| No clear | 90 | 4.15 | 16 |
| M | 60 | 16.6 | 17 |
| No clear | 40 | 72 | 18 |
| M1 | 60 | 3050 | 19 |
| M | 11 | 6800 | 20 |
| HA | 60 | 5300 | 21 |
| IBV | M | 150 | 6.64 | 15 |
| HA | 60 | 625 | 21 |
| NS1 and NEP | 60 | 3050 | 19 |
| No clear | 45 | 9.63 | 22 |
| MP | 60 | 460 | 23 |
| No clear | 120 | 1.66 | 24 |
| NP | 90 | 1.7 | 25 |
| IAV&IBV | IAV-PB2& IBV-PB1 | 5 | 100 | This work |

**Table S4 The sequences of primers and probes used in qPCR kits**

| Name | Sequence (5'-3') | |
| --- | --- | --- |
| Forward primer | F1 | ATACGACTCACTATAGGGATGTCTGATAATGGACCCCAAAATCA (for SARS-CoV-2, N gene) |
| Reverse primer | R1 | TTAGGCCTGAGTTGAGTCAGCA (for SARS-CoV-2, N gene) |

**Table S5. The sequences of primers and probes used in RT-PCR kits.**

| Name | Sequence (5'-3') | |
| --- | --- | --- |
| Forward primer | F1 | TTACAAACATTGGCCGCAAA  (for amplifying a segment of the SARS-CoV-2 N gene) |
| F2 | GACAGGAGAAGAACCCAGCA  (for amplifying a segment of the IAV PB2 gene) |
| F3 | GAAGAAGGAACGGCATCTCT  (for amplifying a segment of the IBV PB1 gene) |
| Reverse primer | R1 | GCGCGACATTCCGAAGAA  (for amplifying a segment of the SARS-CoV-2 N gene) |
| R2 | GAGATCTGCATGACCAGGAT  (for amplifying a segment of the IAV PB2 gene) |
| R3 | TGCAGTCCATCCCATAAGTAT  (for amplifying a segment of the IBV PB1 gene) |
| **TaqMan Probe** | P1 FAM- ACAATTTGCCCCCAGCGCTTCAG- BHQ1 (N gene)  P2 FAM-TCCTATTCCACCATGTCACAGCC-BHQ1 (IAV PB2 gene)  P3 FAM-AGGAGTAGCCGCACTAGGGATAA-BHQ1 (IBV PB1 gene) | |

**Table S6. The sequences of crRNAs used in this work.**

| Name | Sequence (5'-3') | |
| --- | --- | --- |
| **crRNA** | crRNA1 for N gene | GAUUUAGACUACCCCAAAAACGAAGGGGACUAAAACUCUGAGGGUCCACCAAACGUAAUGCGGG |
| crRNA1 for IAV-PB2 gene | GAUUUAGACUACCCCAAAAACGAAGGGGACUAAAACUCCUAUUCCACCAUGUCACAGCCAGAGG |
| crRNA1 for IBV-PB1 gene | GAUUUAGACUACCCCAAAAACGAAGGGGACUAAAACUCCAAUGUUUUUGAUGCCUAGUGCUGCU |

**Table S7. The sequences of targets used in this work.**

| Name | Sequence (5'-3') | |
| --- | --- | --- |
| **Target** | SARS-CoV-2 Ngene | AAUCAGCGAAAUGCACCCCGCAUUACGUUUGGUGGACCCUCAGAUUCAACUGGCAGUAAC |
| IAV PB2 gene | UGAUGGUAUCACCUCUGGCUGUGACAUGGUGGAAUAGGAAUGGCCCAACA |
| IBV PB1 gene | GUGUUGGGAGUAGCAGCACUAGGCAUCAAAAACAUUGGAAACAAGGAAUA |
| RSV M gene | CUCCACAUACACAGCUGCUGUUCAAUACAAUGUCUUAGA AAAAGACGAUG |

**Table S8. The gene sequences of N gene, IAV-PB2 gene and IBV-PB1 gene**

| Name | Sequence (5'-3') | |
| --- | --- | --- |
| SARS-CoV-2 gene | N | ATGTCTGATAATGGACCCCAAAATCAGCGAAATGCACCCCGCATTACGTTTGGTGGACCCTCAGATTCAACTGGCAGTAACCAGAATGGAGAACGCAGTGGGGCGCGATCAAAACAACGTCGGCCCCAAGGTTTACCCAATAATACTGCGTCTTGGTTCACCGCTCTCACTCAACATGGCAAGGAAGACCTTAAATTCCCTCGAGGACAAGGCGTTCCAATTAACACCAATAGCAGTCCAGATGACCAAATTGGCTACTACCGAAGAGCTACCAGACGAATTCGTGGTGGTGACGGTAAAATGAAAGATCTCAGTCCAAGATGGTATTTCTACTACCTAGGAACTGGGCCAGAAGCTGGACTTCCCTATGGTGCTAACAAAGACGGCATCATATGGGTTGCAACTGAGGGAGCCTTGAATACACCAAAAGATCACATTGGCACCCGCAATCCTGCTAACAATGCTGCAATCGTGCTACAACTTCCTCAAGGAACAACATTGCCAAAAGGCTTCTACGCAGAAGGGAGCAGAGGCGGCAGTCAAGCCTCTTCTCGTTCCTCATCACGTAGTCGCAACAGTTCAAGAAATTCAACTCCAGGCAGCAGTAGGGGAACTTCTCCTGCTAGAATGGCTGGCAATGGCGGTGATGCTGCTCTTGCTTTGCTGCTGCTTGACAGATTGAACCAGCTTGAGAGCAAAATGTCTGGTAAAGGCCAACAACAACAAGGCCAAACTGTCACTAAGAAATCTGCTGCTGAGGCTTCTAAGAAGCCTCGGCAAAAACGTACTGCCACTAAAGCATACAATGTAACACAAGCTTTCGGCAGACGTGGTCCAGAACAAACCCAAGGAAATTTTGGGGACCAGGAACTAATCAGACAAGGAACTGATTACAAACATTGGCCGCAAA(FP)TTGCACAATTTGCCCCCAGCGCTTCAG(TaqMan)CGTTCTTCGGAATGTCGCGC(RP)ATTGGCATGGAAGTCACACCTTCGGGAACGTGGTTGACCTACACAGGTGCCATCAAATTGGATGACAAAGATCCAAATTTCAAAGATCAAGTCATTTTGCTGAATAAGCATATTGACGCATACAAAACATTCCCACCAACAGAGCCTAAAAAGGACAAAAAGAAGAAGGCTGATGAAACTCAAGCCTTACCGCAGAGACAGAAGAAACAGCAAACTGTGACTCTTCTTCCTGCTGCAGATTTGGATGATTTCTCCAAACAATTGCAACAATCCATGAGCAGTGCTGACTCAACTCAGGCCTAA |
| IAV Gene | PB2 | AGCGAAAGCAGGTCAATTATATTCAATATGGAAAGAATAAAAGAACTAAGAAATCTAATGTCGCAGTCTCGCACCCGCGAGATACTCACAAAAACCACCGTGGACCATATGGCCATAATCAAGAAGTACACATCAGGAAGACAGGAGAAGAACCCAGCA(FP)CTTAGGATGAAATGGATGATGGCAATGAAATATCCAATTACAGCAGACAAGAGGATAACGGAAATGATTCCTGAGAGAAATGAGCAAGGACAAACTTTATGGAGTAAAATGAATGATGCCGGATCAGACCGAGTGATGGTATCACCTCTGGCTGTGACATGGTGGAATAGGA(TaqMan)ATGGCCCAACAACAAATACAGTTCATTATCCAAAAATCTACAAAACTTATTTTGAAAGAGTCGAAAGGCTAAAGCATGGAACCTTTGGCCCTGTCCATTTTAGAAACCAAGTCAAAATACGTCGGAGAGTTGACATAAATCCTGGTCATGCAGATCTC(RP)AGTGCCAAGGAGGCACAGGATGTAATCATGGAAGTTGTTTTCCCTAACGAAGTGGGAGCCAGGATACTAACATCGGAATCGCAACTAACGATAACCAAAGAGAAGAAAGAAGAACTCCAGGATTGCAAAATTTCTCCTTTGATGGTTGCATACATGTTGGAGAGAGAACTGGTCCGCAAAACGAGATTCCTCCCAGTGGCTGGTGGAACAAGCAGTGTGTACATTGAAGTGTTGCATTTGACTCAAGGAACATGCTGGGAACAGATGTATACTCCAGGAGGGGAAGTGAAGAATGATGATGTTGATCAAAGCTTGATTATTGCTGCTAGGAACATAGTGAGAAGAGCTGCAGTATCAGCAGACCCACTAGCATCTTTATTGGAGATGTGCCACAGCACACAGATTGGTGGAATTAGGATGGTAGACATCCTTAAGCAGAACCCAACAGAAGAGCAAGCCGTGGGTATATGCAAGGCTGCAATGGGACTGAGAATTAGCTCATCCTTCAGTTTTGGTGGATTCACATTTAAGAGAACAAGCGGATCATCAGTCAAGAGAGAGGAAGAGGTGCTTACGGGCAATCTTCAAACATTGAAGATAAGAGTGCATGAGGGATATGAAGAGTTCACAATGGTTGGGAGAAGAGCAACAGCCATACTCAGAAAAGCAACCAGGAGATTGATTCAGCTGATAGTGAGTGGGAGAGACGAACAGTCGATTGCCGAAGCAATAATTGTGGCCATGGTATTTTCACAAGAGGATTGTATGATAAAAGCAGTTAGAGGTGATCTGAATTTCGTCAATAGGGCGAATCAGCGACTGAATCCTATGCATCAACTTTTAAGACATTTTCAGAAGGATGCGAAAGTGCTTTTTCAAAATTGGGGAGTTGAACCTATCGACAATGTGATGGGAATGATTGGGATATTGCCCGACATGACTCCAAGCATCGAGATGTCAATGAGAGGAGTGAGAATCAGCAAAATGGGTGTAGATGAGTACTCCAGCACGGAGAGGGTAGTGGTGAGCATTGACCGGTTCTTGAGAGTCCGGGACCAACGAGGAAATGTACTACTGTCTCCCGAGGAGGTCAGTGAAACACAGGGAACAGAGAAACTGACAATAACTTACTCATCGTCAATGATGTGGGAGATTAATGGTCCTGAATCAGTGTTGGTCAATACCTATCAATGGATCATCAGAAACTGGGAAACTGTTAAAATTCAGTGGTCCCAGAACCCTACAATGCTATACAATAAAATGGAATTTGAACCATTTCAGTCTTTAGTACCTAAGGCCATTAGAGGCCAATACAGTGGGTTTGTGAGAACTCTGTTCCAACAAATGAGGGATGTGCTTGGGACATTTGATACCGCACAGATAATAAAACTTCTTCCCTTCGCAGCCGCTCCACCAAAGCAAAGTAGAATGCAGTTCTCCTCATTTACTGTGAATGTGAGGGGATCAGGAATGAGAATACTTGTAAGGGGCAATTCTCCTGTATTCAACTACAACAAGGCCACGAAGAGACTCACAGTTCTCGGAAAGGATGCTGGCACTTTAACCGAAGACCCAGATGAAGGCACAGCTGGAGTGGAGTCCGCTGTTCTGAGGGGATTCCTCATTCTGGGCAAAGAAGACAGGAGATATGGGCCAGCATTAAGCATCAATGAACTGAGCAACCTTGCGAAAGGAGAGAAGGCTAATGTGCTAATTGGGCAAGGAGACGTGGTGTTGGTAATGAAACGAAAACGGGACTCTAGCATACTTACTGACAGCCAGACAGCGACCAAAAGAATTCGGATGGCCATCAATTAGTGTCGAATAGTTTAAAAACGACCTTGTTTCTACT |
| IBV Gene | PB1 | AGCAGAAGCGGAGCTTTAAGATGAATATAAATCCATATTTTCTTTTCATAGATGTACCTATACAGGCAGCAATTTCAACAACATTCCCATACACCGGTGTTCCCCCTTATTCTCATGGAACGGGAACAGGCTACACAATAGACACCGTGATTAGAACACACGAGTACTCAAACAAGGGAAAACAATACATTTCTGATGTTACAGGATGTGTAATGGTAGATCCAACAAATGGGCCATTACCCGAAGACAATGAACCGAGTGCCTATGCACAATTGGATTGTGTTCTGGAGGCTTTGGATAGAATGGATGAAGAACATCCAGGTCTGTTTCAAGCAGGGTCACAGAATGCCATGGAGGCACTAATGGTCACAACAGTGGACAAATTGACTCAGGGGAGACAGACCTTTGATTGGACGGTGTGTAGAAACCAACCTGCTGCAACGGCACTGAACACAACAATAACCTCTTTTAGGTTGAATGATTTAAATGGAGCCGACAAGGGTGGATTAGTGCCCTTTTGCCAAGATATCATTGATTCATTAGACAAACCTGAAATGATTTTCTTCACAGTAAAGAATATAAAGAAAAAATTGCCTGCTAAAAACAGAAAGGGTTTCCTTATAAAAAGAATACCTATGAAGGTAAAAGACAGAATAACAAGAGTGGAATACATCAAAAGAGCATTATCATTAAACACAATGACTAAAGATGCTGAAAGAGGCAAACTAAAAAGAAGAGCAATTGCCACCGCTGGGATACAAATCAGAGGATTTGTATTAGTAGTTGAAAACTTGGCTAAAAATATCTGTGAAAATCTAGAGCAAAGTGGTTTACCCGTAGGTGGAAACGAAAAGAAGGCCAAACTATCAAATGCAGTGGCTAAAATGCTCAGTAATTGTCCACCAGGAGGGATCAGTATGACTGTGACAGGAGACAATACTAAATGGAATGAATGCTTAAATCCAAGAATCTTTTTGGCTATGACTGAAAGAATAACCAGAGACAGCCCAATTTGGTTCCGGGATTTTTGTAGTATAGCACCGGTCTTGTTCTCCAATAAAATAGCTAGATTGGGAAAAGGGTTCATGATAACAAGTAAAACAAAAAGACTAAAAGCTCAAATACCTTGTCCCGATCTGTTTAATATACCATTAGAAAGATATAATGAAGAAACAAGGGCAAAACTGAAAAAGCTAAAACCTTTCTTCAATGAAGAAGGAACGGCATCTCT(FP)TTCGCCAGGAATGATGATGGGAATGTTTAATATGCTATCTACAGTATTAGGAGTAGCCGCACTAGGGATAA(TaqMan)AAAACATTGGAAACAAAGAATACTTATGGGATGGACTGCA(RP)GTCTTCGGATGATTTTGCTCTGTTTGTTAATGCAAAAGATGAAGAGACATGTATGGAAGGAATAAACGATTTTTACCGAACATGTAAGCTATTGGGAATAAACATGAGCAAAAAGAAAAGTTACTGTAATGAAACTGGGATGTTTGAATTTACCAGCATGTTTTACAGAGATGGATTTGTATCTAATTTTGCAATGGAACTCCCTTCATTTGGAGTCGCTGGAGTGAATGAATCAGCAGACATGGCAATAGGAATGACAATAATAAAGAACAATATGATCAACAATGGGATGGGCCCAGCAACGGCACAAACAGCCATACAATTATTCATAGCTGACTATAGATACACCTACAAATGCCACAGGGGAGATTCCAAAGTGGAAGGGAAGAGAATGAAAATTATAAAGGAGCTATGGGAAAACACTAAAGGAAGAGATGGTCTATTAGTAGCAGATGGTGGGCCTAATCTTTACAATTTGAGAAACCTGCATATTCCAGAAATAATATTAAAATACAACATAATGGACCCTGAGTACAAAGGACGGTTACTGCATCCTCAAAATCCCTTTGTAGGACATTTGTCTATTGAGGGTATCAAAGAAGCAGATATAACACCTGCACATGGCCCAATAAAGAAAATGGACTACGATGCGGTATCTGGAACTCATAGTTGGAGAACCAAAAGGAACAGATCTATACTAAACACTGATCAGAGGAACATGATTCTTGAGGAACAATGCTACGCTAAGTGTTGCAACCTTTTTGAGGCTTGCTTTAACAGTGCGTCATACAGGAAACCAGTAGGCCAGCACAGCATGCTTGAAGCTATGGCCCACAGATTAAGAATGGATGCACGACTGGACTATGAGTCAGGAAGGATGTCAAAAGAGGATTTCGAAAAAGCAATGGCTCACCTTGGTGAGATTGGGTACATGTAAGCTCCGGAAATGTCTATGGGGTTATTGGTCATCGTTGAATACATGCGGTGCACAAATGATTAAAATGAAAAAAGGCTCGTGTTTCTACT |

**Table S9. Fabrication parameters of the single-plex chip.**

| **Name** | **Length** | **Width** | **Height** |
| --- | --- | --- | --- |
| The glass slide | 75 mm | 25.6 mm | 1 mm |
| The microstructuer surface | 43 mm | 22 mm | 0.05 mm |
| The sample reservoir | 18 mm (diameter) | | 0.3 mm |
| The dam | 3 mm | 0.9 mm | 0.27 mm |
| The channel | 20 mm | 3 mm | 0.3 mm |
| The collection zone | 6 mm (diameter) | | 0.3 mm |

**Table S10. Pattern parameters of the duplex chip.**

| **Name** | **Length** | **Width** | **Height** |
| --- | --- | --- | --- |
| The glass slide | 50 mm | 50 mm | 1 mm |
| The microstructure surface | As shown in supplementary Fig. 20bⅡ | | 0.005mm |
| The reservoir A | 18 mm (diameter) | | 0.3 mm |
| The dam 1-2 | 3 mm | 0.9 mm | 0.27 mm |
| Channel 1-2 | 10 mm | 3 mm | 0.30 mm |
| The isolation zone | 18 mm | 2 mm | 0.005 mm |
| The reservoir B | 12 mm (diameter) | | 0.01 mm |
| The channel 3 | 10 mm | 3 mm | 0.01 mm |

**Movie S1. Detection of serial dilutions of the SARS-CoV-2 N gene ranging from 10 aM to 10 pM.**

**Movie S2. Analysis of clinical nasal swab samples with Ct values between 28 and 34.**

**Movie S3. The effect of dimension ratio between reservoir B and reservoir A (rB:rA) on directional transport efficiency.**

**Movie S4. Detection outcome for IAV-positive sample.**

**Movie S5. Detection outcome for IBV-positive sample.**

**Movie S6. Detection results for the mixed lAV-positive/lBV-positive sample and blank.**

**Movie S7. Analytical sensitivity assessment using serial dilutions (100 aM–10 pM) of synthetic IAV-PB2 and IBV-PB1 RNA targets at equal concentrations.**

**Movie S8. Clinical validation with nasal swab samples: pooled analysis of ten IAV-positive (Ct=28-33) and ten IBV-positive (Ct=28-33) clinical specimens.**

**References**

1. Zhang T*, et al.* A paper-based assay for the colorimetric detection of SARS-CoV-2 variants at single-nucleotide resolution. *Nat. Biomed. Eng.* **6**, 957-967 (2022).

2. Yamazaki W, Matsumura Y, Thongchankaew-Seo U, Yamazaki Y, Nagao M. Development of a point-of-care test to detect SARS-CoV-2 from saliva which combines a simple RNA extraction method with colorimetric reverse transcription loop-mediated isothermal amplification detection. *J. Clin. Virol.* **136**, 104760 (2021).

3. Huang Z*, et al.* Electrochemical detection of viral nucleic acids by DNA nanolock-based porous electrode device. *Anal. Chem.* **95**, 16668-16676 (2023).

4. Heo W, Lee K, Park S, Hyun K-A, Jung H-I. Electrochemical biosensor for nucleic acid amplification-free and sensitive detection of severe acute respiratory syndrome coronavirus 2 (SARS-CoV-2) RNA via CRISPR/Cas13a trans-cleavage reaction. *Biosens. Bioelectron.* **201**, 113960 (2022).

5. Wang Z*, et al.* Amplification‐Free, Sequencing‐Free, Detection of Viral RNAs with Variant Specification by Discrete Nanocounting. *Adv. Funct. Mater.* **35**, 2310157 (2025).

6. Lu R, Wu X, Wan Z, Li Y, Jin X, Zhang C. A novel reverse transcription loop-mediated isothermal amplification method for rapid detection of SARS-CoV-2. *Int. J. Mol. Sci.* **21**, 2826 (2020).

7. Chandrasekaran SS*, et al.* Rapid detection of SARS-CoV-2 RNA in saliva via Cas13. *Nat. Biomed. Eng.* **6**, 944-956 (2022).

8. Yu H*, et al.* Rapid and unamplified detection of SARS-CoV-2 RNA via CRISPR-Cas13a-modified solution-gated graphene transistors. *ACS Sens.* **7**, 3923-3932 (2022).

9. Fozouni P*, et al.* Amplification-free detection of SARS-CoV-2 with CRISPR-Cas13a and mobile phone microscopy. *Cell* **184**, 323-333. e329 (2021).

10. Wang Y*, et al.* CRISPR-Cas13a cascade-based viral RNA assay for detecting SARS-CoV-2 and its mutations in clinical samples. *Sens. Actuators B Chem.* **362**, 131765 (2022).

11. Tian T, Qiu Z, Jiang Y, Zhu D, Zhou X. Exploiting the orthogonal CRISPR-Cas12a/Cas13a trans-cleavage for dual-gene virus detection using a handheld device. *Biosens. Bioelectron.* **196**, 113701 (2022).

12. Zhang D, Zhou Y, Li X, Luan Q. CRISPR/Cas13a‐Enhanced Porous Hydrogel Encapsulated Photonic Barcodes for Multiplexed Detection of Virus. *Small* **21**, 2408725 (2025).

13. Mahas A*, et al.* Characterization of a thermostable Cas13 enzyme for one-pot detection of SARS-CoV-2. *PNAS* **119**, e2118260119 (2022).

14. Shan X*, et al.* Nucleic acid amplification-free digital detection method for SARS-CoV-2 RNA based on droplet microfluidics and CRISPR–Cas13a. *Anal. Chem.* **95**, 16489-16495 (2023).

15. Chung H-Y*, et al.* Novel dual multiplex real-time RT-PCR assays for the rapid detection of SARS-CoV-2, influenza A/B, and respiratory syncytial virus using the BD MAX open system. *Emerg. Microbes Infect.* **10**, 161-166 (2021).

16. Lin M*, et al.* Cas12a Cis-cleavage mediated lateral flow assay enables multiplex and ultra-specific nucleic acid detection. *Nat. Commun.* **16**, 5597 (2025).

17. Zhao X, Zheng X, Yang X, Guo Q, Zhang Y, Lou J. Establishment of a Lateral Flow Dipstick Detection Method for Influenza A Virus Based on CRISPR/Cas12a System. *China CDC Wkly.* **6**, 946 (2024).

18. Ma Y-D, Chen Y-S, Lee G-B. An integrated self-driven microfluidic device for rapid detection of the influenza A (H1N1) virus by reverse transcription loop-mediated isothermal amplification. *Sens. Actuators B Chem.* **296**, 126647 (2019).

19. Ji J*, et al.* AM‐DMF‐ddRPA: An All‐in‐One Digital Microfluidic Platform for Rapid and Automatic Digital Nucleic Acid Analysis. *Angew. Chem. Int. Ed.* **64**, e202501913 (2025).

20. Kumar N*, et al.* Label-free peptide nucleic acid biosensor for visual detection of multiple strains of influenza A virus suitable for field applications. *Anal. Chim. Acta.* **1093**, 123-130 (2020).

21. Wang R*, et al.* Rapid detection of multiple respiratory viruses based on microfluidic isothermal amplification and a real-time colorimetric method. *Lab Chip.* **18**, 3507-3515 (2018).

22. Xu D*, et al.* Fast-Flu: RT-RPA-CRISPR/Cas12a assisted one-step platform for rapid influenza B virus detection. *Microbiol. Spectr.* **13**, e00365-00325 (2025).

23. Li R*, et al.* Evaluation of a novel micro/nanofluidic chip platform for the detection of influenza A and B virus in patients with influenza-like illness. *AMB Express* **9**, 77 (2019).

24. Li X, Wang M, Chen J, Lin F, Wang W. Nucleic acid detection and quantitative analysis of influenza virus using exhaled breath condensate. *J. Breath Res.* **15**, 026001 (2021).

25. Ji M*, et al.* Automated multiplex nucleic acid tests for rapid detection of SARS-CoV-2, influenza A and B infection with direct reverse-transcription quantitative PCR (dirRT-qPCR) assay in a centrifugal microfluidic platform. *RSC Adv.* **10**, 34088-34098 (2020).
